1                   **Hyperactive TORC1 sensitizes yeast cells to endoplasmic reticulum stress by**  
2                   **compromising cell wall integrity**

3  
4  
5  
6  
7                   Khadija Ahmed<sup>1</sup>, David E. Carter<sup>2</sup> and Patrick Lajoie<sup>1</sup>

8  
9                   <sup>1</sup>Department of Anatomy and Cell Biology, The University of Western Ontario, London, Ontario,  
10                  Canada, N6A 5C1.

11                  <sup>2</sup>Robarts Research Institute, The University of Western Ontario, London, Ontario, Canada N6A5B7

12  
13  
14  
15                  <sup>1</sup>Corresponding author:

16  
17                  Patrick Lajoie, PhD  
18                  Department of Anatomy and Cell Biology  
19                  The University of Western Ontario  
20                  London, Ontario N6A 5C1  
21                  Canada  
22                  Email: [plajoie3@uwo.ca](mailto:plajoie3@uwo.ca)

23  
24  
25  
26                  **Running Title:** Hyperactive TORC1 and ER stress

27  
28                  **Keywords:** TORC1, Endoplasmic reticulum stress, cell wall integrity, caspofungin, unfolded protein  
29                  response

30  
31  
32

33 **ABSTRACT**

34

35 The disruption of protein folding homeostasis in the endoplasmic reticulum (ER) results in an  
36 accumulation of toxic misfolded proteins and activates a network of signaling events collectively known  
37 as the unfolded protein response (UPR). While UPR activation upon ER stress is well characterized,  
38 how other signaling pathways integrate into the ER proteostasis network is unclear. Here, we sought to  
39 investigate how the target of rapamycin complex 1 (TORC1) signaling cascade acts in parallel with the  
40 UPR to regulate ER stress sensitivity. Using *S. cerevisiae*, we found that TORC1 signaling is  
41 attenuated during ER stress and constitutive activation of TORC1 increases sensitivity to ER stressors  
42 such as tunicamycin and inositol deprivation. This phenotype is independent of the UPR. Transcriptome  
43 analysis revealed that TORC1 hyperactivation results in cell wall remodelling. Conversely, hyperactive  
44 TORC1 sensitizes cells to cell wall stressors, including the antifungal caspofungin. Elucidating the  
45 crosstalk between the UPR, cell wall integrity, and TORC1 signaling may uncover new paradigms  
46 through which the response to protein misfolding is regulated, and thus have crucial implications for the  
47 development of novel therapeutics against pathogenic fungal infections.

48

49

50 **IMPORTANCE**

51

52 The prevalence of pathogenic fungal infections, coupled with the emergence of new fungal pathogens,  
53 has brought these diseases to the forefront of global health problems. While antifungal treatments have  
54 advanced over the last decade, patient outcomes have not substantially improved. These shortcomings  
55 are largely attributed to the evolutionary similarity between fungi and humans, which limits the scope of  
56 drug development. As such, there is a pressing need to understand the unique cellular mechanisms  
57 that govern fungal viability. Given that *Saccharomyces cerevisiae* is evolutionarily related to a number  
58 of pathogenic fungi, and in particular to the *Candida* species, most genes from *S. cerevisiae* are highly  
59 conserved in pathogenic fungal strains. Here we show that hyperactivation of TORC1 signaling  
60 sensitizes *S. cerevisiae* cells to both endoplasmic reticulum stress and cell wall stressors by  
61 compromising cell wall integrity. Therefore, targeting TORC1 signaling and endoplasmic reticulum  
62 stress pathways may be useful in developing novel targets for antifungal drugs.

63

64

65

## 66 INTRODUCTION

67  
68 The ability of cells to respond to detrimental stresses, such as an aberrant accumulation of toxic  
69 misfolded proteins, dictates cell fate under both normal and pathological conditions. Loss of secretory  
70 protein homeostasis due to pharmacological, genetic, or environmental perturbations activates a  
71 plethora of adaptive responses to help cells overcome the stress (1, 2). In yeast, the ER resident  
72 protein Ire1 detects changes in the ER misfolded protein and activates a transcriptional response  
73 termed the unfolded protein response (UPR; (3–7). Upon induction of ER stress, the ER chaperone,  
74 Kar2, dissociates from the luminal domain of Ire1, allowing it to oligomerize, trans-autophosphorylate,  
75 and subsequently activate its cytosolic RNase activity (4, 5, 8–10). Ire1 then splices *HAC1* mRNA to  
76 generate a functional variant of the transcript, which upon translation functions as a transcription factor  
77 to upregulate genes involved in ER quality control machinery and ribosome biogenesis (5, 8). Cellular  
78 adaptation to ER stress is not only dependent on the amplitude of the UPR signal, but also on the  
79 selective expression of UPR target genes capable of overcoming a particular stress condition (11).  
80 Interestingly, Pincus *et al.* (2014) show that *S. cerevisiae* amplify the UPR with time delayed Ras/PKA  
81 signaling, indicating that the response to ER stress is not limited to the UPR (12). Moreover, induction  
82 of ER stress activates transcription of genes associated with other types of stress responses (2).  
83 Therefore, elucidating how the UPR integrates with other signaling pathways under conditions of ER  
84 stress is essential to understand how proteostasis is mediated in the cell.

85  
86 Given that protein folding in the ER is a highly energetically demanding process, low nutrient status is a  
87 potent trigger of the UPR (13). Therefore, the interconnection between metabolic regulation and the  
88 UPR is a crucial area of study, one that has thus far been inadequately addressed. Accumulating  
89 evidence suggests that the cellular metabolism mediating AMPK signaling cascade and its subsequent  
90 regulation of crucial proteins acetyl-CoA carboxylase and TOR, may cooperate with the UPR to  
91 mediate cell viability under conditions of ER stress (13–15); however, the mechanisms behind this  
92 crosstalk remain to be elucidated. In yeast, TORC1 inhibition with rapamycin protects yeast cells from  
93 ER stress-induced vacuolar fragmentation and promotes antifungal synergism (16). In addition,  
94 pharmacological induction of ER stress triggers autophagy, a process negatively regulated by TORC1  
95 (17). It therefore appears that TOR signaling is an important determinant of the yeast ER stress  
96 response.

97  
98 In *S. cerevisiae*, TOR kinases are evolutionarily conserved serine/threonine kinases that function at the  
99 core of signaling networks involved in cell growth, metabolism, and nutrient and hormone sensing (18,  
100 19). These TOR kinases are the central component of two distinct complexes: TOR complex 1  
101 (TORC1) and TOR complex 2 (TORC2), of which only TORC1 is rapamycin sensitive (20). In particular,  
102 the TORC1 signaling network mediates anabolism and catabolism by coordinating cellular and  
103 metabolic processes such as transcription, protein translation, ribosome biogenesis, and cellular  
104 architecture (20–23). In addition to mediating anabolic processes, TORC1 promotes cell growth by  
105 inhibiting a number of stress response pathways (21, 24, 25). Nevertheless, the manner in which the  
106 secretory and TORC1 signaling pathway act in parallel, under conditions of ER stress, remains to be  
107 elucidated.

108  
109 To study the effect of TORC1 signaling on protein folding homeostasis, we employed a hyperactive  
110 variant of the TOR1 kinase (*TOR1<sup>L2134M</sup>*) and assessed yeast sensitivity to ER stress. We elucidate a  
111 novel interplay between proteostasis and TORC1 signaling and show that attenuation of TORC1  
112 signaling is required for adaptation to ER stress. On the other hand, constitutive activation of TORC1  
113 confers increased sensitivity to ER stressors, including the antifungal caspofungin, by compromising  
114 cell wall architecture. Our study, therefore, expands the role of ER homeostasis beyond the UPR and  
115 defines how TORC1 signaling contributes to the ER stress response.

116  
117  
118  
119

## 120 RESULTS AND DISCUSSION

### 121 122 **Hyperactive *TOR1*<sup>L2134M</sup> sensitizes cells to ER stress.**

123 Previous studies show that the TOR pathway links nutrient status to cell growth and ribosome  
124 biogenesis, under conditions of protein misfolding stress (26–28). However, it remains unclear to what  
125 extent modulation of TORC1 signaling is required for adaptation to ER stress. Thus, we sought to  
126 investigate the effects of TORC1 signaling on the sensitivity to ER stress.

127  
128 The phosphorylation of the ribosomal protein, Rps6, is regulated in a TORC1-dependent manner and  
129 serves as a valid readout for TORC1 activity *in vivo* (29, 30). Previous reports indicate that under  
130 conditions of oxidative- and proteotoxic stress, RPS6 phosphorylation is dramatically reduced (31, 32).  
131 Therefore, we sought to investigate whether ER stress reduces Rps6 phosphorylation in cells with  
132 hyperactive TORC1 signaling (Fig. 1A). As such, cells expressing either WT *TOR1* or hyperactive  
133 *TOR1*<sup>L2134M</sup> were treated with the canonical ER stress inducer, tunicamycin (Tm; Fig. 1B). Tm is a  
134 potent inducer of the UPR as it inhibits N-glycosylation of proteins, prevents proper protein folding, and  
135 thereby causes an accumulation of misfolded proteins in the ER (33). While the addition of Tm (2.5  
136 ug/mL) significantly decreased Rps6 phosphorylation in cells expressing WT *TOR1*, there was no  
137 significant difference in cells expressing hyperactive *TOR1*<sup>L2134M</sup> (Fig. 1B-C). Rapamycin, an inhibitor of  
138 TORC1, was used as a positive control, for Sch9 downregulation. Combined with previous studies  
139 showing that phosphorylation of Sch9, another TORC1 effector, is decreased during Tm treatment (34),  
140 our results suggest that TORC1 deactivation plays an important role in ER stress tolerance. As such,  
141 we then sought to determine how impacting proper TORC1 signaling affects the cell's response to ER  
142 stressors.

143  
144 First, we assessed cell growth in the presence of both Tm and the TORC1 inhibitor, rapamycin (Fig.  
145 1D). We found that rapamycin treatment exacerbates the growth defect caused by Tm-induced ER  
146 stress (Fig. 1D). Similarly, cells expressing a rapamycin-resistant hyperactive *TOR1*<sup>L2134M</sup> (24)  
147 displayed an increased growth defect upon Tm stress (Fig. 1D). To investigate the effects of  
148 hyperactive *TOR1* on a more physiologically relevant ER stressor, cells were exposed to conditions of  
149 inositol withdrawal. While it is unclear how exactly inositol deprivation triggers UPR activation, some  
150 studies have postulated that it triggers the UPR by either changing the lipid composition of the ER  
151 membrane (35–37) or by impairing membrane trafficking (38, 39). In contrast to cells expressing WT  
152 *TOR1*, cells expressing the hyperactive allele were inositol auxotrophs (Fig. 1D). Increased ER stress  
153 sensitivity of *TOR1*<sup>L2134M</sup> was confirmed using liquid growth assays (Fig. 1E-F). As expected, compared  
154 to cells expressing WT *TOR1*, cells expressing hyperactive *TOR1*<sup>L2134M</sup> had a significant growth defect  
155 following treatment with Tm (Fig. 1E) or inositol withdrawal (Fig. 1F). Interestingly, we previously  
156 showed that TOCR1 hyperactivation using the *TOR1*<sup>L2134M</sup> strain also sensitizes yeast to expanded  
157 polyglutamine proteins (40) linked to ER stress and UPR activation in yeast and other models of  
158 Huntington's disease (41, 42). Taken together, our results indicate that defective TORC1 signaling  
159 increases sensitivity to canonical ER stressors. Both phenotypes can be linked to a defective response  
160 to ER stress.

### 161 162 **Cells expressing hyperactive *TOR1*<sup>L2134M</sup> have a functional UPR**

163 Having shown that cells expressing hyperactive *TOR1*<sup>L2134M</sup> are more sensitive to ER stress, we next  
164 sought to examine whether this increased sensitivity was due to defects in the ability to activate the  
165 UPR. As previously described, under conditions of ER stress, the ER protein folding sensor, Ire1,  
166 splices *HAC1* mRNA to produce an active transcription factor (4). We therefore assessed the ability of  
167 Ire1 to splice *HAC1* mRNA using RT-PCR (Fig. 2A-B). Surprisingly, inositol withdrawal induced *HAC1*  
168 splicing in both WT *TOR1* and hyperactive *TOR1*<sup>L2134M</sup> mutants (Fig. 2A, arrow). Additionally, after 1 hr  
169 of treatment with Tm, cells expressing hyperactive *TOR1*<sup>L2134M</sup> spliced *HAC1* mRNA, and this response  
170 was still evident after 2 hrs of induction, as indicated by a smaller fragment in the agarose gel (Fig. 2B,  
171 arrow). As a whole, these results indicate that increased ER sensitivity of cells expressing hyperactive  
172 *TOR1*<sup>L2134M</sup> is not due to impaired functionality of the UPR.

173

174 Spliced *HAC1* mRNA is translated into an active transcription factor, which then translocates to the  
175 nucleus where it binds to unfolded protein response element (UPRE) sequences in gene promoters<sup>44</sup>.  
176 In response to ER stress, Hac1 alone activates over 400 UPR target genes, including ER chaperones,  
177 genes that mediate membrane expansion, and genes involved in ribosome biogenesis (1, 43, 44). As  
178 such, increased sensitivity to ER stress may be due to an inability to transcriptionally activate the UPR.  
179 We tested this possibility by transforming a UPRE-mcherry fluorescent reporter (45) into cells  
180 expressing *TOR1* and *TOR1*<sup>L2134M</sup> and assessing UPR activation with fluorescence microscopy (Fig.  
181 2C-D). Surprisingly, there was no significant difference between cells expressing *TOR1* and  
182 hyperactive *TOR1*<sup>L2134M</sup> in their ability to activate the UPR under conditions of Tm stress and inositol  
183 withdrawal. Additionally, we quantitatively assessed the mRNA levels of the yeast resident chaperone  
184 and canonical UPR target gene, *KAR2*, using qRT-PCR (Fig. 3A). In line with our previous data,  
185 hyperactive *TOR1*<sup>L2134M</sup> was able to increase the expression of *KAR2*, following treatment with Tm and  
186 inositol withdrawal. Taken together, these results suggest that the increased sensitivity of cells  
187 expressing *TOR1*<sup>L2134M</sup> to ER stress is unlikely to be due to impaired UPR activation.

188

189 Additionally, actively dividing yeast allocate up to 85% of their transcriptional activity to ribosome  
190 biogenesis (46); however, under conditions of ER stress, there is a downregulation in the expression of  
191 ribosome genes in order to increase the expression of UPR target genes (47, 48). As such, we  
192 employed qRT-PCR to assess the expression of *RPL30*, a gene involved in ribosome biogenesis (Fig.  
193 3B). Cells expressing hyperactive *TOR1*<sup>L2134M</sup> significantly downregulated expression of *RPL30* (Fig.  
194 3B). This is probably due to the fact that multiple pathways regulate ribosome biogenesis. For example,  
195 PKA deactivation during ER stress is also responsible for repressing transcription of ribosomal protein  
196 genes (12). Furthermore, depleting inositol triggers the ER stressor, Ire1, which induces transcription of  
197 the inositol biosynthetic gene, *INO1* (8, 49). Therefore, we investigated whether the inositol auxotrophy  
198 of cells expressing *TOR1*<sup>L2134M</sup> was due to the inability to synthesize *INO1*. Cells expressing *TOR1* and  
199 *TOR1*<sup>L2134M</sup> were treated with inositol withdrawal and qRT-PCR was conducted to assess the  
200 expression of *INO1* and *RPL30* (Fig. 3C-D). Interestingly, hyperactive *TOR1*<sup>L2134M</sup> impaired the  
201 transcription of *INO1* (Fig. 3C) but did not impair ribosome biogenesis (Fig. 3D). Taken together, these  
202 results suggest that under conditions of ER stress, cells expressing hyperactive *TOR1*<sup>L2134M</sup> are  
203 defective in regulating *INO1* transcription.

204

### 205 Defects in cell wall integrity underlie *TOR1*<sup>L2134M</sup> sensitivity to ER stress

206 Despite having a functional UPR, our studies show that cells expressing hyperactive *TOR1*<sup>L2134M</sup> have  
207 increased sensitivity to canonical ER stressors. Therefore, to assess how ER stress alters the  
208 transcriptome in hyperactive *TOR1*<sup>L2134M</sup> mutants, we treated two independent cultures of WT *TOR1*  
209 and hyperactive *TOR1*<sup>L2134M</sup> cells with Tm and used microarray analysis to uncover genes that were  
210 differentially expressed in hyperactive *TOR1*<sup>L2134M</sup> cells (Fig. 4A-D). Data was analyzed by filtering for  
211 genes that showed a two-fold change in expression with a p value < 0.05. The transcripts of the genes  
212 that were differentially downregulated (Fig. 4C) and upregulated (Fig. 4D) were categorized based on  
213 their cellular components using the yeast SGD GO term finder. Interestingly, among the genes that  
214 were upregulated, a large majority encoded proteins that localized to the cell periphery and plasma  
215 membrane (Fig. 4D). Of note, genes encoding three cell wall incorporated mannoproteins, *FIT1*, *FIT2*,  
216 and *FIT3* were upregulated in hyperactive *TOR1*<sup>L2134M</sup> cells (Fig. 4D). Fit proteins are involved in iron  
217 uptake (50). Validation with qRT-PCR revealed that hyperactive *TOR1*<sup>L2134M</sup> cells had significantly  
218 higher steady-state levels of *FIT1*, *FIT2*, and *FIT3*, compared to cells expressing WT *TOR1* (Fig. 4E-G).  
219 Interestingly, *FIT* genes are also upregulated in cells carrying deletions in genes encoding the  
220 phosphatases *PTC1* and *PTC6* that displayed compromised TORC1 signaling (51). Additionally, the  
221 expression of both *FIT2* and *FIT3* was significantly higher compared to WT *TOR1* cells following  
222 treatment with Tm (Fig. 4F-G). Interestingly, increased mannoprotein levels is observed in cells with  
223 compromised cell wall (52). Taken together, these results suggest that hyperactive *TOR1*<sup>L2134M</sup> alters  
224 the cell wall composition of yeast cells.

225

226 ER stress tolerance in yeast depends on the activation of the cell wall integrity pathway, which is, in  
227 part, regulated by TORC1 (53–57). Additionally, cells with defects in cell wall integrity exhibit inositol  
228 auxotrophy (58). As such, we investigated whether the increased sensitivity of cells expressing  
229 hyperactive *TOR1<sup>L2134M</sup>* was due to defects in cell wall integrity. A general approach to assess whether  
230 a specific phenotype is due to a cell wall defect is to test the remedial effects of the cell wall  
231 stabilizer sorbitol (59). Interestingly, supplementing with sorbitol rescued the toxicity caused by Tm  
232 stress in hyperactive *TOR1<sup>L2134M</sup>* mutants (Fig. 5A), suggesting that these cells have a defective cell  
233 wall. To further examine cell wall composition, cells expressing *TOR1* and *TOR1<sup>L2134M</sup>* were treated with  
234 the cell wall antagonist, calcofluor white (CFW) and liquid growth assays were assessed (Fig. 5B). In  
235 line with our previous results, cells expressing hyperactive *TOR1<sup>L2134M</sup>* were significantly more sensitive  
236 to CFW than cells expressing WT *TOR1* (Fig. 5B). Previous literature indicates that due to increased  
237 activation of cell wall stress responses, yeast strains with defects in cell wall integrity have a greater  
238 deposition of chitin in their cell wall and become more sensitive to the CFW (60). Therefore, cells  
239 expressing *TOR1* and *TOR1<sup>L2134M</sup>* were stained with CFW and chitin staining was analyzed using  
240 fluorescence microscopy and flow cytometry (Fig. 5C). Compared to WT *TOR1* cells, cells expressing  
241 hyperactive *TOR1<sup>L2134M</sup>* appeared more clustered and displayed significantly more chitin content (Fig.  
242 5C). Taken together, our data suggests that the increased sensitivity of hyperactive *TOR1<sup>L2134M</sup>* mutants  
243 can be traced back to defects in cell wall integrity.

244  
245 Consistent with a defect in cell wall biogenesis, loss of function of any kinase downstream of the  
246 canonical MAPK cell wall integrity pathway (CWI) results in growth defects at elevated temperatures  
247 (61–64). Therefore, we investigated whether the increased sensitivity of hyperactive *TOR1<sup>L2134M</sup>* to ER  
248 stress could be attributed to defects in the canonical CWI pathway. Surprisingly, compared to WT  
249 *TOR1* cells, cells expressing hyperactive *TOR1<sup>L2134M</sup>* showed no growth defect at elevated  
250 temperatures (Fig. 5D). To further investigate whether the CWI pathway was impaired, we assessed  
251 the effects of constitutive activation of the CWI pathway by transforming a hyperactive *BCK1-20* allele  
252 into WT *TOR1* and hyperactive *TOR1<sup>L2134M</sup>* cells (Fig. 5E). Interestingly, *BCK1-20* overexpression  
253 equally rescued Tm toxicity in both WT *TOR1* and hyperactive *TOR1<sup>L2134M</sup>* cells (Fig. 5E), with  
254 *TOR1<sup>L2134M</sup>* cells still displaying increased sensitivity compared to wild-type. These results indicate that  
255 other regulators of the cell wall composition downstream of Bck1 may be defective in the mutant cells.

### 256 257 **Hyperactive *TOR1<sup>L2134M</sup>* cells have defects in glucan synthase expression and are more sensitive** 258 **to caspofungin**

259 Within the host organism, pathogenic fungi face numerous environmental stressors such as low nutrient  
260 availability and changes in pH and temperature (65, 66). As such, the fungal cell wall acts as the first  
261 line of defense, providing a rigid cellular boundary to withstand internal turgor pressure and  
262 extracellular stresses (67). Proper cell wall architecture requires three major components:  $\beta$ -1-3-glucan,  
263 chitin, and mannoproteins— all of which come together to form a large macromolecular complex (67,  
264 68). Our results indicate that cells expressing hyperactive *TOR1<sup>L2134M</sup>* increase expression of  
265 mannoprotein genes as well as chitin aggregation, both of which are phenotypes associated with  
266 impaired  $\beta$ -1-3-glucan synthesis (69–71). To test this possibility, we used qRT-PCR to assess the  
267 expression of the  $\beta$ -1-3-glucan synthase genes, *FKS2* and *FKS1* (Fig. 6A-B). Interestingly, expression  
268 of both *FKS2* (Fig. 6A) and *FKS1* (Fig. 6B) was significantly decreased in hyperactive *TOR1<sup>L2134M</sup>* cells,  
269 following treatment with Tm. Given that  $\text{Ca}^{2+}$ / calcineurin and CWI signaling converge to mediate  
270 *FKS1/2* expression (70, 72), we differentially assessed the activity of these pathways. There was no  
271 evidence that the  $\text{Ca}^{2+}$ / calcineurin pathway was impaired in presence of Tm-induced ER stress  
272 (Supplementary Fig. 1). Additionally, we examined the activation of Rlm1 – another transcription factor  
273 regulating cell wall integrity– by assessing the expression of its downstream target, *PRM5* (Fig. 6C).  
274 We found that activation of the Rlm1 branch was not impaired in hyperactive *TOR1<sup>L2134M</sup>* cells (Fig. 6C).  
275 Taken together, our results support the notion that defects in the cell wall architecture of hyperactive  
276 *TOR1<sup>L2134M</sup>* mutants may be due to dysregulation of other regulators of the cell wall integrity such as the  
277 SWI4/6-SBF complex. More comprehensive studies will be required to uncover the complex role of  
278 TORC1 in the control of cell wall biogenesis and maintenance.

279

280 Given that the cell wall is essential for fungal survival and its composition is unique to the fungal  
281 organism, this structure acts as an ideal target for antifungal drugs (73). Notably, echinocandins  
282 represent the first class of antifungal drugs that specifically target the fungal cell wall (74, 75). In  
283 particular, the echinocandin caspofungin acts as a fungicide by noncompetitively inhibiting the  $\beta$ -1-3-  
284 glucan synthases, Fks1 and Fks2, thereby blocking cell wall synthesis (76). Since our results indicate  
285 that hyperactive *TOR1*<sup>L2134M</sup> impairs *FKS2* and *FKS1* synthesis, we investigated whether this defect  
286 sensitizes cells to the antifungal, caspofungin (Fig. 6D). Indeed, cells expressing hyperactive  
287 *TOR1*<sup>L2134M</sup> exhibited a growth defect as compared to WT *TOR1* cells, and this defect was further  
288 exacerbated with increasing concentrations of caspofungin (Fig. 6D). To further elucidate the  
289 connection between ER stress signaling and sensitivity to antifungal drugs, we examined the growth of  
290 *ire1Δ* cells following treatment with caspofungin (Fig. 6E). Compared to wild-type strains, *ire1Δ* showed  
291 hypersensitivity to caspofungin, suggesting that a functional ER stress response is required for  
292 resistance to this antifungal drug (Fig. 6E). Similarly, UPR-deficient strains of pathological fungi such as  
293 *C. neoformans* and *A. fumigatus* show decreased virulence in animal models (77–80). Interestingly,  
294 deletion of *MDS3* in *Candida albicans* leads to TORC1 hyperactivation resulting in filamentation  
295 defects, supporting a negative role for TORC1 hyperactivation in pathogenicity (81). Conversely,  
296 reduced TORC1 signaling in *oma1Δ* strains resulted in attenuated TORC1 signaling and increased  
297 virulence in *Candida albicans* (82). Thus, the amplitude of TORC1 signaling emerges as an important  
298 determinant of the capacity of *C. albicans* cells to withstand stress such as oxidative stress (83) and  
299 perhaps ER stress, thus impacting its virulence and pathogenicity.

300  
301 While initially described as distinct pathways, our research points to a functional interaction between  
302 the UPR, TORC1, and CWI signaling pathways. Here, we use a hyperactive variant of *TOR1* to present  
303 a novel mechanism of ER stress regulation by TORC1 signaling. We show that attenuation of TORC1  
304 signaling is required for adaptation to ER stress, and that hyperactive TORC1 signaling results in  
305 compromised cell wall architecture. Taken together, we propose that hyperactivation of TORC1  
306 signaling alters cell wall composition, sensitizing cells to ER stress causing agents such as antifungal  
307 drugs.

## 308 309 **Conclusion**

310 The high prevalence of pathogenic fungal infections, coupled with the emergence of new fungal  
311 pathogens, has rapidly brought these diseases to the forefront of global health problem. Of particular  
312 concern are the millions of people worldwide that will contract life-threatening invasive fungal infections  
313 (IFI) – diseases with a mortality rate which exceeds 50%, even with the availability of antifungal  
314 treatments (84, 85). As a whole, the aetiological agents responsible for more than 90% of IFI-related  
315 deaths fall largely within four genera of fungi: *Cryptococcus*, *Candida*, *Aspergillus*, and *Pneumocytis*  
316 (84, 86). While antifungal treatments have advanced over the last decade, patient outcomes have not  
317 substantially improved (87). These shortcomings are largely attributed to the evolutionary similarity  
318 between fungi and humans, which limits the scope of drug development against fungal specific targets.  
319 As such, there is a pressing need to understand the unique cellular mechanisms that govern fungal  
320 viability. Given that *S. cerevisiae* is evolutionarily related to a number of pathogenic fungi, and in  
321 particular to the *Candida* species (88), most genes from *S. cerevisiae* are highly conserved in  
322 pathogenic fungal strains. Among the shared genomic features includes similar mechanisms for cell  
323 wall homeostasis (89–91) and activation of stress responses (92). Here we show that hyperactivation of  
324 TORC1 signaling sensitizes yeast cells to both ER stress and cell wall stressors by compromising cell  
325 wall integrity. Therefore, targeting TORC1 signaling and ER stress pathways may be useful in  
326 developing novel targets for antifungal drugs.

## 327 328 **MATERIALS AND METHODS**

### 329 330 **Yeast strains and methods**

331 The *Saccharomyces cerevisiae* strains and plasmids used in this study are listed in Tables 2.1 and 2.2,  
332 respectively. All yeast strains are derivatives of BY4742. The TS161 (*TOR1*) and TS184 (*TOR1*<sup>L2134M</sup>)  
333 strains were kind gifts from Dr. Maeda (24). BY4742 or derivatives were thawed from frozen stocks and

334 grown on YPD (yeast extract peptone dextrose) or selective SC (synthetic complete) media for 2 days  
 335 at 30°C before being transferred to liquid cultures. All experiments were carried out using either SC  
 336 media containing 2% wv<sup>-1</sup> glucose supplemented with 100x inositol or YPD media. Cultures were grown  
 337 at 30°C with constant agitation or on selective agar plates.  
 338

339 *Table 1: Yeast Strains*

| Strains             | Genotype                                          | Reference           |
|---------------------|---------------------------------------------------|---------------------|
| BY4742              | <i>MATα his3Δ1 leu2Δ0 lys2Δ0 ura3Δ0</i>           | (93, 94)            |
| TS161               | <i>MATα ura3-52</i>                               | (24)                |
| TS184               | <i>MATα ura3-52 TOR1L2134M</i>                    | (24)                |
| BY4742 <i>ire1Δ</i> | <i>MATα his3Δ1 leu2Δ0 lys2Δ0 ura3Δ0 IRE1::KAN</i> | Deletion collection |

340  
 341

*Table 2: Plasmids*

| Plasmids                            | Number                  | Vector Backbone | Resistance | Reference |
|-------------------------------------|-------------------------|-----------------|------------|-----------|
| pPM47 (UPR-RFP CEN/ARS URA3)        | Addgene plasmid # 20132 | pRS316          | URA        | (45)      |
| pAMS366 (4X CDRE- <i>lacZ</i> URA3) | –                       | pAMS366         | URA        | (95)      |
| pRS316 BCK1-20                      | –                       | pRS316          | URA        | (96)      |
| pRS416 GPD                          | ATCC 87360              | pRS416          | URA        | (97)      |

342  
 343

### Spotting and liquid growth assays

344 Cell growth was assessed by both spot assay and liquid culture as previously described by Duennwald  
 345 (2013). Briefly, spotting assays were performed with yeast cells that were cultured overnight in selective  
 346 media with 2% glucose as the sole carbon source. Cells were then diluted to equivalent concentrations  
 347 of OD<sub>600</sub> 0.2 and were spotted in 4 sequential five-fold dilutions. Equal spotting was controlled by  
 348 simultaneously spotting cells using a multi-channel ultra-high-performance pipette (VWR International).  
 349 Cells were grown on selective plates at 30°C for 2 days and imaged using a Geldoc system (Bio-RAD).  
 350 For liquid cultures cells were diluted to OD<sub>600</sub> 0.15 and incubated at 30°C. OD<sub>600</sub> was measured every  
 351 15 mins using a BioscreenC plate reader (Growth curves USA) for 24 h. Growth curves were generated  
 352 and the area under the curve was calculated for biological replicates. Statistical significance was  
 353 determined using a two-tailed student T-test and GraphPad (Prism).  
 354

### Yeast Transformation

355 Yeast transformations were performed using the lithium acetate transformation protocol as previously  
 356 described(98). Briefly, 1 mL of OD<sub>600</sub> = 1, overnight cultures were pelleted at 3000 xg for 1 min. Cells  
 357 were aspirated and washed with 1.5 mL sterile 0.1 M LiAc in TE buffer. Cells were then pelleted and  
 358 resuspended in 285 μL sterile 50% PEG 4000 in 0.1M LiAc, 2.5 μL plasmid, and 10 μL boiled salmon  
 359 sperm DNA, and incubated at 30°C for 45 mins. After that, 43 μL of sterile DMSO was added and cells  
 360 were heat shocked for 15 min at 42°C before being plated on amino acid selection plates.  
 361  
 362

### Drugs

363 Stock solutions of tunicamycin (5 μg mL<sup>-1</sup> in DMSO; Amresco), calcofluor white (30 mg mL<sup>-1</sup> in H<sub>2</sub>O;  
 364 Sigma Aldrich), rapamycin (1 mg mL<sup>-1</sup> in DMSO; Fisher Bioreagents), sorbitol (3 M in H<sub>2</sub>O; Fisher  
 365 Bioreagents), and fluorescent brightener 28 (Calcofluor white stain; 25μM; Sigma Aldrich) were used at  
 366 the indicated concentrations.  
 367  
 368  
 369



## 370 Stress Condition Experiments

371 In all the experiments, yeast cultures were grown to log phase ( $OD_{600} \sim 0.3$ ) before being exposed to  
372 different stress conditions. Endoplasmic reticulum stress was achieved by adding  $0.5 \mu\text{g mL}^{-1}$ ,  $1.0 \mu\text{g mL}^{-1}$ , or  $2.5 \mu\text{g mL}^{-1}$   
373 tunicamycin (Amresco) or by inositol withdrawal. For inositol depletion experiments,  
374 cells were washed twice in SC media (YNB-Inositol; Sunrise Science) and then resuspended into pre-  
375 warmed SC media lacking inositol. Cell wall stress was achieved by adding  $5\text{-}20 \mu\text{g mL}^{-1}$  calcofluor  
376 white. Sorbitol rescue assays were facilitated by adding 1 M sorbitol to the media.

## 377 qRT-PCR

378 RNA extraction was performed using the MasterPure Yeast RNA Purification Kit (Epicentre). cDNA was  
379 synthesized using the RevertAid H Minus First Strand cDNA Synthesis Kit (Thermoscientific). The  
380 cDNA preparations were used as templates for amplification using SsoAdvanced<sup>TM</sup> Universal SYBR @  
381 Green Supermix (Bio-Rad). The primers used are listed in Table 3. The relative expression levels were  
382 calculated using the comparative Ct method with *U3* as a reference gene.

383  
384  
385 *Table 3: Primers*

| Gene         | Forward Primer       | Reverse Primer        |
|--------------|----------------------|-----------------------|
| <i>U3</i>    | CCCAGAGTGAGAAACCGAAA | AGGATGGGTCAAGATCATCG  |
| <i>KAR2</i>  | CCGGTGAAGAAGGTGTCGAA | CATGGCTCTTTCACCCCTCGT |
| <i>RPL30</i> | ATCATTGCCGCTAACACTCC | CCGACAGCAGTACCCAATTC  |
| <i>INO1</i>  | TCGACGTACAAGGACAACGA | GGCCACTAAAGTGGAGCCAT  |
| <i>HAC1</i>  | ACGACGCTTTTGTGCTTCT  | TCTTCGGTTGAAGTAGCACAC |
| <i>PRM5</i>  | GACATAAGGAAACCCGCAA  | CCAGCATGTGCTCGAGATAA  |
| <i>FKS2</i>  | CTGAGCGCCGTATTTCAAT  | CGGGTGTAAATTGCTTCAGGT |
| <i>FKS1</i>  | TTTGTTCCAATTGGGTGTT  | CCGCAAACACTTCGAACATA  |
| <i>FIT1</i>  | GTGAACGTGCTCCTGTCTCA | GTTTACCCTCACCAGTCCAT  |
| <i>FIT2</i>  | GACACCGCTGACCCTATCAT | GATGATTCGACGGCTTGAGT  |
| <i>FIT3</i>  | TATCACTGCCACCAAGAACG | AATTCAGCGGTGCTAGAGGA  |

386  
387 **Fluorescence Microscopy**  
388 *TOR1* and *TOR1*<sup>L2134M</sup> cells expressing a UPR-mcherry fluorescent reporter were grown to mid-log  
389 phase before being treated with  $2.5 \mu\text{g mL}^{-1}$  tunicamycin (Amresco) or inositol withdrawal for 3 h. Cells  
390 were diluted 10X, transferred to a 96 well plate, and imaged at room temperature. Fluorescence  
391 microscopy was performed using the Cytation 5 Cell Imaging Multi-Mode Reader (BioTek); the 20X  
392 objective lens and Texas Red Filter cube ( $586\text{--}647\text{-}1\text{ nm}$ ) were used. Images were analyzed using  
393 ImageJ software (<https://imagej.nih.gov/ij/>). Violin plots presented in Figure 2D were generated using  
394 the PlotsOfData software (99).

## 395 396 HAC1 Splicing Assay

397 Cells were cultured to mid-log phase before being treated with either  $1.0 \mu\text{g/mL}$  tunicamycin (Amresco)  
398 or inositol withdrawal for 2 h. RNA extraction was performed using the MasterPure Yeast RNA  
399 Purification Kit (Epicentre). cDNA was synthesized from the extracted RNA using the RevertAid H  
400 Minus First Strand cDNA Synthesis Kit (Thermoscientific). The cDNA preparations were then used as  
401 templates for RT-PCR with *HAC1* primers (listed in Table 4). The resulting reaction product was  
402 separated by electrophoresis on an agarose gel and bands were visualized using a Geldoc system  
403 (Bio-Rad).

## 404 405 $\beta$ -galactosidase Assay

406 *TOR1* and *TOR1*<sup>L2134M</sup> yeast strains transformed with plasmids carrying the *CDRE-LacZ* reporter were  
407 assayed as previously described (100). Briefly, cells were grown to log phase in selective SC media,  
408 harvested by centrifugation, then cultured in SC media containing the indicated concentrations of  
409 stressors or  $\text{CaCl}_2$ . After incubation at  $30^\circ\text{C}$  for 2 h, cells were harvested by centrifugation and

410 resuspended in lacZ buffer. To measure  $\beta$ -galactosidase activity, 50  $\mu$ L cell lysate was mixed with 950  
411  $\mu$ L lacZ buffer containing 2.7  $\mu$ L  $\beta$ -mercaptoethanol, 1 drop 0.1% SDS, 2 drops  $\text{CHCl}_3$  and incubated at  
412 30°C for 15 min. The reaction was started by adding 100  $\mu$ L ONPG (4 mg  $\text{mL}^{-1}$ ) and incubated at 30°C  
413 till the colour changed to yellow. The reaction was stopped by adding 300  $\mu$ L of 1 M  $\text{Na}_2\text{CO}_3$ .  $\beta$ -  
414 galactosidase activity was determined at 420 nm absorbance using a plate reader, normalizing data to  
415 cell density.

416

#### 417 **Protein Extraction and Western Blot**

418 Cells were lysed using alkaline lysis with 0.1 M NaOH (101) and proteins were extracted into 4x  
419 Laemmli sample buffer containing 100 mM DTT. Protein samples were separated using SDS-PAGE  
420 (BioRad Mini-PROTEAN TGX Pre-Cast gels, 4-15%) and transferred to nitrocellulose membranes  
421 using the BioRad Trans-Blot® Turbo™ RTA Transfer Kit. Membranes were blocked with 5% fat free  
422 milk for 30 mins, before probing with P-S6 Ribosomal Protein S235 236<sup>-1</sup> Rabbit Ab (Cell Signaling  
423 Technology) or anti-PGK1 (Invitrogen) overnight at 4°C. Membranes were then incubated with the  
424 Alexa Fluor 488 goat anti-rabbit for 1 hr. Membranes were imaged using a BioRad infrared imager  
425 (BioRad).

426

#### 427 **Calcofluor White Stain Microscopy and Flow Cytometry**

428 *TOR1* and *TOR1*<sup>L2134M</sup> cells were grown in triplicate to mid-log phase in YPD media, before being  
429 treated with Fluorescent Brightener 28 (Sigma-Adlrlich) to a final concentration of 25  $\mu$ M. Cells were  
430 grown for 20 min at 30°C with continuous shaking before they were pelleted and washed in SC media.  
431 Cells were diluted 10x in growth media and plated in Lab-Tek (Thermo Inc.) imaging chambers and  
432 processed for fluorescence microscopy. Images were acquired using a Zeiss AxioVert A1 wide field  
433 fluorescence microscopy equipped with a 63X NA 1.4 Plan Apochromat objective, 359 nm excitation  
434 461 nm<sup>-1</sup> emission (DAPI) long pass filter and an AxioCam ICM1 R1 CCD camera (Carl Zeiss inc.).  
435 Images were analyzed using ImageJ software. For flow cytometric analysis, cells were cultured in  
436 appropriate media and processed for flow cytometry using a BD Bioscience FACS Celesta flow  
437 cytometer equipped with a 405 nm Violet laser. Data was analyzed using the BD FACS Diva Software.  
438 All conditions were performed in triplicate, 20 000 cells were analyzed, and mean fluorescence  
439 intensities were calculated. No gates were applied.

440

#### 441 **Microarray Analysis**

442 *TOR1* and *TOR1*<sup>L2134M</sup> yeast cultures were grown to log phase ( $\text{OD}_{600} \sim 0.3$ ) before being treated with  
443 tunicamycin (2.5  $\mu\text{g}/\text{mL}$ ). RNA was extracted from two independent cultures ( $n=2$ ) and quality was  
444 assessed with Bioanalyzer as previously described (102). Microarray analysis was conducted with the  
445 GeneChip® Yeast Genome 2.0 Array (Affymetrix, Santa Clara, California, USA). Briefly, biotinylated  
446 complementary RNA (cRNA) was prepared from 100 ng of total RNA as per the GeneChip 3' IVT PLUS  
447 Reagent Kit manual (ThermoFisher Scientific, Waltham, MA).  
448 (<https://www.thermofisher.com/order/catalog/product/902416>). Data was analyzed using the  
449 Transcriptome Analysis Console (TAC) software (Affymetrix) by filtering for genes that showed a two-  
450 fold change in expression with a p-value of 0.05 using sacCer3 as a reference genome. Gene lists were  
451 created using the gene ontology term finder on the *Saccharomyces* genome database  
452 (<https://www.yeastgenome.org/>). All microarray data were submitted to the GEO database as series  
453 GSE129200.

454 **ACKNOWLEDGMENTS**

455 We thank Dr. Tasuya Maeda (University of Tokyo), Dr. Martha Cyert (Stanford University), and Marina  
456 Molina (Universidad Complutense Madrid) for the yeast plasmids and strains. This work is supported by  
457 a National Science and Engineering Research Council of Canada (NSERC) discovery grant (RGPIN-  
458 2015-06400) to PL and an NSERC Canada Graduate Scholarship to KA. PL is the recipient of a John  
459 R. Evans Leaders Fund award (#35183) from the Canadian Foundation for Innovation (CFI) with  
460 matching fund from the Ontario Research Fund. The authors thank Dr Christopher Brandl, Dr Martin  
461 Duennwald, and Dr Rebecca Shapiro for useful discussions about the manuscript.

462  
463 **COMPETING INTERESTS**

464 None

465  
466  
467

468 **FIGURE LEGENDS**

469

470 **Figure 1: Cells expressing hyperactive  $TOR1^{L2134M}$  are more sensitive to ER stress.**

471 **(A)** Representative schematic of the downstream targets of TORC1 kinase activity. **(B)** Western blot  
472 analysis of Rps6 phosphorylation following treatment with tunicamycin (Tm; 2.5  $\mu\text{g}/\text{mL}$ ) or rapamycin  
473 (Rap; 200 ng/mL). Pgk1 was used as a loading control. **(C)** Quantification of (B). Rps6 phosphorylation  
474 is not significantly attenuated in hyperactive  $TOR1^{L2134M}$  cells following treatment with tunicamycin (n=4;  
475  $\pm$  SD). **(D)** Cell growth of WT  $TOR1$  and  $TOR1^{L2134M}$  cells was assessed by serial dilutions on YPD  
476 plates supplemented with rapamycin (Rap; 10 ng/mL), tunicamycin (Tm; 1.0  $\mu\text{g}/\text{mL}$ ), both Rap and Tm,  
477 or SC plates supplemented without inositol (+/- Inositol). Cells expressing hyperactive  $TOR1^{L2134M}$  were  
478 more resistant to rapamycin treatment and more sensitive to tunicamycin stress and inositol withdrawal.  
479 **(E-F)** Liquid growth assays of yeast cells expressing WT  $TOR1$  and  $TOR1^{L2134M}$  were used to further  
480 assess sensitivity to tunicamycin stress (Tm; 1.0  $\mu\text{g}/\text{mL}$ ) and inositol withdrawal (-Ino). Data is  
481 quantified as area under the curve (AUC; \*p < 0.01; mean  $\pm$  SD; n=3). All conditions were run  
482 simultaneously. Control conditions are reproduced on both panels for clarity.

483

484 **Figure 2: The UPR is not impaired in yeast cells expressing hyperactive  $TOR1^{L2134M}$ .**

485 **(A)** Treatment with ER stressors induces *HAC1* mRNA splicing. WT  $TOR1$  and hyperactive  $TOR1^{L2134M}$   
486 mutant were either untreated (Ctrl.), subjected to inositol withdrawal (-Ino) for 2hrs, or **(B)** treated with  
487 tunicamycin (Tm; 1.0  $\mu\text{g}/\text{mL}$ ) for up to 2 hrs. RT-PCR was conducted using *HAC1* primers. Arrows  
488 indicate Ire1 mediated *HAC1* splicing. **(C)** Representative fluorescence microscopy images of WT  
489  $TOR1$  and  $TOR1^{L2134M}$  cells expressing UPR-mcherry fluorescent reporters, following treatment with  
490 tunicamycin (Tm; 1.0  $\mu\text{g}/\text{mL}$ ) and inositol withdrawal (-Ino) for 2 hours. **(D)** Quantification of (C).

491

492 **Figure 3: Hyperactive  $TOR1^{L2134M}$  can transcriptionally activate the UPR, but has impaired  
493 inositol synthesis.**

494 **(A)** Hyperactive  $TOR1^{L2134M}$  can upregulate expression of the ER chaperone *KAR2* following treatment  
495 with tunicamycin (Tm; 2.5  $\mu\text{g}/\text{mL}$ ) or inositol withdrawal (-Ino) (n =3;  $\pm$  SD). **(B)** Following treatment with  
496 tunicamycin stress (Tm; 2.5  $\mu\text{g}/\text{mL}$ ), hyperactive  $TOR1^{L2134M}$  can downregulate expression of *RPL30*  
497 (n=3;  $\pm$  SD). **(C)** Under conditions of inositol withdrawal (-Ino), cells expressing hyperactive  $TOR1^{L2134M}$   
498 have impaired synthesis of *INO1*. Cells expressing WT  $TOR1$  and hyperactive  $TOR1^{L2134M}$  were treated  
499 with inositol withdrawal for 2 hrs. qRT-PCR was conducted using *INO1* primers (n= 3;  $\pm$  SD). **(D)**  
500 Inositol withdrawal does not induce downregulation of *RPL30*. Cells expressing WT  $TOR1$  and  
501 hyperactive  $TOR1^{L2134M}$  were subjected to inositol withdrawal for 2 hrs (n=3;  $\pm$  SD).

502

503 **Figure 4: ER stress induces a change in the cell wall composition of cells expressing  
504 hyperactive  $TOR1^{L2134M}$ .**

505 **(A)** Microarray analysis of genes differentially expressed in yeast cells expressing WT  $TOR1$  or  
506 hyperactive  $TOR1^{L2134M}$ , following treatment with tunicamycin (Tm; 2.5  $\mu\text{g}/\text{mL}$ ). Arrows indicate cell wall  
507 genes that are differentially expressed in cells expressing hyperactive  $TOR1^{L2134M}$ . **(B)** Microarray  
508 analysis of genes differentially expressed in  $TOR1$  and  $TOR1^{L2134M}$  control cells compared to  $TOR1$  and  
509  $TOR1^{L2134M}$  cells treated with tunicamycin (Tm; 2.5  $\mu\text{g}/\text{mL}$ ). **(C)** Genes downregulated two-fold in  
510 hyperactive  $TOR1^{L2134M}$  cells in response to tunicamycin stress (Tm; 2.5  $\mu\text{g}/\text{mL}$ ). **(D)** Genes upregulated  
511 two-fold in hyperactive  $TOR1^{L2134M}$  cells in response to tunicamycin stress. Gene ontology lists were  
512 generated with the gene ontology term finder on the *Saccharomyces* genome database. Numerous cell  
513 wall genes are differentially expressed in hyperactive  $TOR1^{L2134M}$  cells compared to cells expressing  
514 WT  $TOR1$ . **(E)** qRT-PCR was used to validate the microarray analysis and assess expression of  
515 mannoprotein genes *FIT1*, **(F)** *FIT2*, and **(G)** *FIT3* following treatment with tunicamycin (Tm; 2.5  $\mu\text{g}/\text{mL}$ ;  
516 n=3;  $\pm$  SD).

517

518

519

520

521

522 **Figure 5: Increased sensitivity of hyperactive  $TOR1^{L2134M}$ , in response to ER stress, is due to**  
523 **defects in cell wall integrity. (A)** Cell growth of WT  $TOR1$  and  $TOR1^{L2134M}$  cells was assessed by  
524 serial dilutions on YPD plates supplemented with various concentrations of tunicamycin (Tm), sorbitol  
525 (1 M), or both tunicamycin and sorbitol. Sorbitol rescues tunicamycin toxicity caused by hyperactive  
526  $TOR1^{L2134M}$ . **(B)** Liquid growth assay of  $TOR1$  and  $TOR1^{L2134M}$  cells following treatment with calcofluor  
527 white (CFW; 20  $\mu\text{g}/\text{mL}$ ). Data was quantified by measuring area under the curve (AUC;  $n=3$ ;  $*p < 0.001$ ;  
528 mean  $\pm$  SD). **(C)** Representative fluorescence microscopy images of cells expressing WT  $TOR1$  and  
529 hyperactive  $TOR1^{L2134M}$ , following treatment with calcofluor white (CFW; 20  $\mu\text{g}/\text{mL}$ ). Cells expressing  
530 hyperactive  $TOR1^{L2134M}$  are aggregated and have increased fluorescence, corresponding to an increase  
531 in chitin synthesis (Left panel). Flow cytometric analysis of cells treated with calcofluor white (CFW; 2.5  
532  $\mu\text{g}/\text{mL}$ ). Cells expressing hyperactive  $TOR1^{L2134M}$  have significantly higher mean fluorescence intensity  
533 compared to WT TOR cells (right panel;  $n = 3$ ; mean  $\pm$  SD). **(D)** Growth of WT  $TOR1$  and  $TOR1^{L2134M}$   
534 cells in response to elevated temperature was assessed by serial dilution on YPD plates. There was no  
535 growth defect caused by hyperactive  $TOR1^{L2134M}$ . **(E)** Cell growth of WT  $TOR1$  and  $TOR1^{L2134M}$   
536 transformed with either an empty vector or BCK1-20 was assessed by serial dilution on SC-ura plates  
537 supplemented with various concentrations of tunicamycin (Tm).  
538

539 **Figure 6: Cell wall perturbations in hyperactive  $TOR1^{L2134M}$  cells may be due to defects in glucan**  
540 **synthesis. (A)** Cells expressing WT  $TOR1$  or hyperactive  $TOR1^{L2134M}$  were treated with tunicamycin  
541 (Tm; 2.5  $\mu\text{g}/\text{mL}$ ) for 2 hrs. Tm induced a significant decrease in the expression of glucan synthase  
542 genes  $FKS2$  and **(B)**  $FKS1$  as measured by qRT-PCR ( $n=3$ ;  $\pm$  SD). **(C)** qRT-PCR was also used to  
543 assess the expression of the Rlm1 target,  $PRM5$  ( $n=3$ ;  $\pm$  SD). **(D)** Cell growth of WT  $TOR1$  and  
544  $TOR1^{L2134M}$  cells was assessed by serial dilutions on YPD plates supplemented with various  
545 concentrations of caspofungin. Compared to WT  $TOR1$ , hyperactive  $TOR1^{L2134M}$  cells displayed  
546 reduced growth. **(E)** Growth of wild-type cells and  $Ire1\Delta$  cells was assessed by serial dilutions on YPD  
547 plates supplemented with various concentrations of caspofungin.  
548

549 **Supplemental Figure 1: The  $\text{Ca}^{2+}$ /calcineurin pathway is not impaired in hyperactive  $TOR1^{L2134M}$**   
550 **mutants. (A)**  $\beta$ -galactosidase activity (measured in LacZ units) was used to assess expression of  
551 calcineurin dependent response element (CDRE) following treatment with  $\text{CaCl}_2$  (1 M), tunicamycin  
552 (Tm; 1.0  $\mu\text{g}/\text{mL}$ ), or inositol withdrawal (-ino;  $n=6$ ). **(B-E)** Growth of cells expressing WT  $TOR1$  or  
553 hyperactive  $TOR1^{L2134M}$  was assessed by liquid growth assay following treatment with 0.05 M  $\text{CaCl}_2$ ,  
554 0.08 M  $\text{CaCl}_2$ , 0.1 M  $\text{CaCl}_2$ , or 0.2 M  $\text{CaCl}_2$ . The area under the curve (AUC) was quantified for each  
555 replicate ( $n=3$ ). All conditions were run simultaneously. Control conditions are reproduced on each  
556 panels for clarity.  
557  
558  
559  
560  
561  
562  
563  
564  
565  
566  
567  
568  
569  
570  
571  
572  
573  
574  
575

576 **REFERENCES**

- 577
- 578 1. **Travers KJ, Patil CK, Wodicka L, Lockhart DJ, Weissman JS, Walter P.** 2000. Functional  
579 and genomic analyses reveal an essential coordination between the unfolded protein response and  
580 ER-associated degradation. *Cell* **101**:249–258.
- 581
- 582 2. **Gasch AP, Spellman PT, Kao CM, Carmel-Harel O, Eisen MB, Storz G, Botstein D, Brown**  
583 **PO.** 2000. Genomic expression programs in the response of yeast cells to environmental changes.  
584 *Mol Biol Cell* **11**:4241–4257.
- 585
- 586 3. **Ron D, Walter P.** 2007. Signal integration in the endoplasmic reticulum unfolded protein  
587 response. *Nat Rev Mol Cell Biol* **8**:519–529.
- 588
- 589 4. **Cox JS, Walter P.** 1996. A novel mechanism for regulating activity of a transcription factor that  
590 controls the unfolded protein response. *Cell* **87**:391–404.
- 591
- 592 5. **Cox JS, Chapman RE, Walter P.** 1997. The unfolded protein response coordinates the  
593 production of endoplasmic reticulum protein and endoplasmic reticulum membrane. *Mol Biol*  
594 *Cell* **8**:1805–1814.
- 595
- 596 6. **Shamu CE, Walter P.** 1996. Oligomerization and phosphorylation of the Ire1p kinase during  
597 intracellular signaling from the endoplasmic reticulum to the nucleus. *EMBO J* **15**:3028–3039.
- 598
- 599 7. **Wu H, Ng BSH, Thibault G.** 2014. Endoplasmic reticulum stress response in yeast and humans.  
600 *Biosci Rep* **34**.
- 601
- 602 8. **Cox JS, Shamu CE, Walter P.** 1993. Transcriptional induction of genes encoding endoplasmic  
603 reticulum resident proteins requires a transmembrane protein kinase. *Cell* **73**:1197–1206.
- 604
- 605 9. **Kimata Y, Kimata YI, Shimizu Y, Abe H, Farcasanu IC, Takeuchi M, Rose MD, Kohno K.**  
606 2003. Genetic evidence for a role of BiP/Kar2 that regulates Ire1 in response to accumulation of  
607 unfolded proteins. *Mol Biol Cell* **14**:2559–2569.
- 608
- 609 10. **Pincus D, Chevalier MW, Aragón T, van Anken E, Vidal SE, El-Samad H, Walter P.** 2010.  
610 BiP binding to the ER-stress sensor Ire1 tunes the homeostatic behavior of the unfolded protein  
611 response. *PLoS Biol* **8**:e1000415.
- 612
- 613 11. **Thibault G, Ismail N, Ng DTW.** 2011. The unfolded protein response supports cellular  
614 robustness as a broad-spectrum compensatory pathway. *Proc Natl Acad Sci U S A* **108**:20597–  
615 20602.
- 616
- 617 12. **Pincus D, Aranda-Díaz A, Zuleta IA, Walter P, El-Samad H.** 2014. Delayed Ras/PKA  
618 signaling augments the unfolded protein response. *Proc Natl Acad Sci U S A* **111**:14800–14805.
- 619
- 620 13. **Bravo R, Parra V, Gatica D, Rodriguez AE, Torrealba N, Paredes F, Wang ZV, Zorzano A,**  
621 **Hill JA, Jaimovich E, Quest AFG, Lavandero S.** 2013. Endoplasmic reticulum and the  
622 unfolded protein response: dynamics and metabolic integration. *Int Rev Cell Mol Biol* **301**:215–  
623 290.
- 624

- 625 14. **Henry SA, Gaspar ML, Jesch SA.** 2014. The response to inositol: regulation of glycerolipid  
626 metabolism and stress response signaling in yeast. *Chem Phys Lipids* **180**:23–43.  
627
- 628 15. **Volmer R, Ron D.** 2015. Lipid-dependent regulation of the unfolded protein response. *Curr Opin*  
629 *Cell Biol* **33**:67–73.  
630
- 631 16. **Kim A, Cunningham KW.** 2015. A LAPF/phafin1-like protein regulates TORC1 and lysosomal  
632 membrane permeabilization in response to endoplasmic reticulum membrane stress. *Mol Biol*  
633 *Cell* **26**:4631–4645.  
634
- 635 17. **Yorimitsu T, Nair U, Yang Z, Klionsky DJ.** 2006. Endoplasmic reticulum stress triggers  
636 autophagy. *J Biol Chem* **281**:30299–30304.  
637
- 638 18. **Heitman J, Movva NR, Hall MN.** 1991. Targets for cell cycle arrest by the immunosuppressant  
639 rapamycin in yeast. *Science* **253**:905–909.  
640
- 641 19. **Loewith R, Hall MN.** 2011. Target of rapamycin (TOR) in nutrient signaling and growth  
642 control. *Genetics* **189**:1177–1201.  
643
- 644 20. **Loewith R, Jacinto E, Wullschleger S, Lorberg A, Crespo JL, Bonenfant D, Oppliger W,**  
645 **Jenoe P, Hall MN.** 2002. Two TOR complexes, only one of which is rapamycin sensitive, have  
646 distinct roles in cell growth control. *Mol Cell* **10**:457–468.  
647
- 648 21. **Wullschleger S, Loewith R, Hall MN.** 2006. TOR signaling in growth and metabolism. *Cell*  
649 **124**:471–484.  
650
- 651 22. **Crespo JL, Hall MN.** 2002. Elucidating TOR signaling and rapamycin action: lessons from  
652 *Saccharomyces cerevisiae*. *Microbiol Mol Biol Rev* **66**:579–91, table of contents.  
653
- 654 23. **Yang H, Rudge DG, Koos JD, Vaidialingam B, Yang HJ, Pavletich NP.** 2013. mTOR kinase  
655 structure, mechanism and regulation. *Nature* **497**:217–223.  
656
- 657 24. **Takahara T, Maeda T.** 2012. Transient sequestration of TORC1 into stress granules during heat  
658 stress. *Mol Cell* **47**:242–252.  
659
- 660 25. **Su K-H, Dai C.** 2017. mTORC1 senses stresses: Coupling stress to proteostasis. *Bioessays* **39**.  
661
- 662 26. **Singh J, Tyers M.** 2009. A Rab escort protein integrates the secretion system with TOR  
663 signaling and ribosome biogenesis. *Genes Dev* **23**:1944–1958.  
664
- 665 27. **Martin DE, Soulard A, Hall MN.** 2004. TOR regulates ribosomal protein gene expression via  
666 PKA and the Forkhead transcription factor FHL1. *Cell* **119**:969–979.  
667
- 668 28. **Lempiäinen H, Uotila A, Urban J, Dohnal I, Ammerer G, Loewith R, Shore D.** 2009. Sfp1  
669 interaction with TORC1 and Mrs6 reveals feedback regulation on TOR signaling. *Mol Cell*  
670 **33**:704–716.  
671
- 672 29. **González A, Shimobayashi M, Eisenberg T, Merle DA, Pendl T, Hall MN, Moustafa T.**  
673 2015. TORC1 promotes phosphorylation of ribosomal protein S6 via the AGC kinase Ypk3 in

- 674 Saccharomyces cerevisiae. PLoS ONE **10**:e0120250.  
675
- 676 30. **Kim K-Y, Truman AW, Caesar S, Schlenstedt G, Levin DE.** 2010. Yeast Mpk1 cell wall  
677 integrity mitogen-activated protein kinase regulates nucleocytoplasmic shuttling of the Swi6  
678 transcriptional regulator. Mol Biol Cell **21**:1609–1619.  
679
- 680 31. **Sfakianos AP, Mellor LE, Pang YF, Kritsiligkou P, Needs H, Abou-Hamdan H, Désaubry**  
681 **L, Poulin GB, Ashe MP, Whitmarsh AJ.** 2018. The mTOR-S6 kinase pathway promotes stress  
682 granule assembly. Cell Death Differ **25**:1766–1780.  
683
- 684 32. **Young SK, Shao Y, Bidwell JP, Wek RC.** 2016. Nuclear matrix protein 4 is a novel regulator of  
685 ribosome biogenesis and controls the unfolded protein response via repression of gadd34  
686 expression. J Biol Chem **291**:13780–13788.  
687
- 688 33. **Heifetz A, Keenan RW, Elbein AD.** 1979. Mechanism of action of tunicamycin on the UDP-  
689 GlcNAc:dolichyl-phosphate Glc-NAc-1-phosphate transferase. Biochemistry **18**:2186–2192.  
690
- 691 34. **Rousseau A, Bertolotti A.** 2016. An evolutionarily conserved pathway controls proteasome  
692 homeostasis. Nature **536**:184–189.  
693
- 694 35. **Promlek T, Ishiwata-Kimata Y, Shido M, Sakuramoto M, Kohno K, Kimata Y.** 2011.  
695 Membrane aberrancy and unfolded proteins activate the endoplasmic reticulum stress sensor Ire1  
696 in different ways. Mol Biol Cell **22**:3520–3532.  
697
- 698 36. **Lajoie P, Moir RD, Willis IM, Snapp EL.** 2012. Kar2p availability defines distinct forms of  
699 endoplasmic reticulum stress in living cells. Mol Biol Cell **23**:955–964.  
700
- 701 37. **Snapp EL.** 2012. Unfolded protein responses with or without unfolded proteins? Cells **1**:926–  
702 950.  
703
- 704 38. **Chang HJ, Jones EW, Henry SA.** 2002. Role of the unfolded protein response pathway in  
705 regulation of INO1 and in the sec14 bypass mechanism in Saccharomyces cerevisiae. Genetics  
706 **162**:29–43.  
707
- 708 39. **Doering TL, Schekman R.** 1996. GPI anchor attachment is required for Gas1p transport from  
709 the endoplasmic reticulum in COP II vesicles. EMBO J **15**:182–191.  
710
- 711 40. **Jiang Y, Berg MD, Genereaux J, Ahmed K, Duennwald ML, Brandl CJ, Lajoie P.** 2019.  
712 Sfp1 links TORC1 and cell growth regulation to the yeast SAGA-complex component Tra1 in  
713 response to polyQ proteotoxicity. Traffic **20**:267–283.  
714
- 715 41. **Duennwald ML, Lindquist S.** 2008. Impaired ERAD and ER stress are early and specific events  
716 in polyglutamine toxicity. Genes Dev **22**:3308–3319.  
717
- 718 42. **Jiang Y, Chadwick SR, Lajoie P.** 2016. Endoplasmic reticulum stress: The cause and solution  
719 to Huntington’s disease? Brain Res **1648**:650–657.  
720
- 721 43. **Welihinda AA, Tirasophon W, Kaufman RJ.** 1999. The cellular response to protein misfolding  
722 in the endoplasmic reticulum. Gene Expr **7**:293–300.



723

- 724 44. **Yoshida H, Matsui T, Yamamoto A, Okada T, Mori K.** 2001. XBP1 mRNA is induced by  
725 ATF6 and spliced by IRE1 in response to ER stress to produce a highly active transcription  
726 factor. *Cell* **107**:881–891.
- 727
- 728 45. **Merksamer PI, Trusina A, Papa FR.** 2008. Real-time redox measurements during endoplasmic  
729 reticulum stress reveal interlinked protein folding functions. *Cell* **135**:933–947.
- 730
- 731 46. **Warner JR.** 1999. The economics of ribosome biosynthesis in yeast. *Trends Biochem Sci*  
732 **24**:437–440.
- 733
- 734 47. **Li Y, Moir RD, Sethy-Coraci IK, Warner JR, Willis IM.** 2000. Repression of ribosome and  
735 tRNA synthesis in secretion-defective cells is signaled by a novel branch of the cell integrity  
736 pathway. *Mol Cell Biol* **20**:3843–3851.
- 737
- 738 48. **Higgins R, Gendron JM, Rising L, Mak R, Webb K, Kaiser SE, Zuzow N, Riviere P, Yang**  
739 **B, Fenech E, Tang X, Lindsay SA, Christianson JC, Hampton RY, Wasserman SA, Bennett**  
740 **EJ.** 2015. The Unfolded Protein Response Triggers Site-Specific Regulatory Ubiquitylation of  
741 40S Ribosomal Proteins. *Mol Cell* **59**:35–49.
- 742
- 743 49. **Nikawa J, Yamashita S.** 1992. IRE1 encodes a putative protein kinase containing a membrane-  
744 spanning domain and is required for inositol phototrophy in *Saccharomyces cerevisiae*. *Mol*  
745 *Microbiol* **6**:1441–1446.
- 746
- 747 50. **Protchenko O, Ferea T, Rashford J, Tiedeman J, Brown PO, Botstein D, Philpott CC.** 2001.  
748 Three cell wall mannoproteins facilitate the uptake of iron in *Saccharomyces cerevisiae*. *J Biol*  
749 *Chem* **276**:49244–49250.
- 750
- 751 51. **González A, Casado C, Ariño J, Casamayor A.** 2013. Ptc6 is required for proper rapamycin-  
752 induced down-regulation of the genes coding for ribosomal and rRNA processing proteins in *S.*  
753 *cerevisiae*. *PLoS ONE* **8**:e64470.
- 754
- 755 52. **Okada H, Abe M, Asakawa-Minemura M, Hirata A, Qadota H, Morishita K, Ohnuki S,**  
756 **Nogami S, Ohya Y.** 2010. Multiple functional domains of the yeast 1,3-beta-glucan synthase  
757 subunit Fks1p revealed by quantitative phenotypic analysis of temperature-sensitive mutants.  
758 *Genetics* **184**:1013–1024.
- 759
- 760 53. **Scrimale T, Didone L, de Mesy Bentley KL, Krysan DJ.** 2009. The unfolded protein response  
761 is induced by the cell wall integrity mitogen-activated protein kinase signaling cascade and is  
762 required for cell wall integrity in *Saccharomyces cerevisiae*. *Mol Biol Cell* **20**:164–175.
- 763
- 764 54. **Krysan DJ.** 2009. The cell wall and endoplasmic reticulum stress responses are coordinately  
765 regulated in *Saccharomyces cerevisiae*. *Commun Integr Biol* **2**:233–235.
- 766
- 767 55. **Worley J, Sullivan A, Luo X, Kaplan ME, Capaldi AP.** 2015. Genome-Wide Analysis of the  
768 TORC1 and Osmotic Stress Signaling Network in *Saccharomyces cerevisiae*. *G3 (Bethesda)*  
769 **6**:463–474.
- 770
- 771 56. **Levin DE.** 2011. Regulation of cell wall biogenesis in *Saccharomyces cerevisiae*: the cell wall

- 772 integrity signaling pathway. *Genetics* **189**:1145–1175.
- 773
- 774 57. **Torres J, Di Como CJ, Herrero E, La Torre-Ruiz MA De.** 2002. Regulation of the cell  
775 integrity pathway by rapamycin-sensitive TOR function in budding yeast. *J Biol Chem*  
776 **277**:43495–43504.
- 777
- 778 58. **Nunez LR, Jesch SA, Gaspar ML, Almaguer C, Villa-Garcia M, Ruiz-Noriega M, Patton-**  
779 **Vogt J, Henry SA.** 2008. Cell wall integrity MAPK pathway is essential for lipid homeostasis. *J*  
780 *Biol Chem* **283**:34204–34217.
- 781
- 782 59. **Popolo L, Gualtieri T, Ragni E.** 2001. The yeast cell-wall salvage pathway. *Med Mycol* **39**  
783 **Suppl 1**:111–121.
- 784
- 785 60. **Ram AFJ, Klis FM.** 2006. Identification of fungal cell wall mutants using susceptibility assays  
786 based on Calcofluor white and Congo red. *Nat Protoc* **1**:2253–2256.
- 787
- 788 61. **Levin DE.** 2005. Cell wall integrity signaling in *Saccharomyces cerevisiae*. *Microbiol Mol Biol*  
789 *Rev* **69**:262–291.
- 790
- 791 62. **Miyazaki T, Inamine T, Yamauchi S, Nagayoshi Y, Saijo T, Izumikawa K, Seki M, Kakeya**  
792 **H, Yamamoto Y, Yanagihara K, Miyazaki Y, Kohno S.** 2010. Role of the Slt2 mitogen-  
793 activated protein kinase pathway in cell wall integrity and virulence in *Candida glabrata*. *FEMS*  
794 *Yeast Res* **10**:343–352.
- 795
- 796 63. **Martín H, Arroyo J, Sánchez M, Molina M, Nombela C.** 1993. Activity of the yeast MAP  
797 kinase homologue Slt2 is critically required for cell integrity at 37 degrees C. *Mol Gen Genet*  
798 **241**:177–184.
- 799
- 800 64. **Lee KS, Irie K, Gotoh Y, Watanabe Y, Araki H, Nishida E, Matsumoto K, Levin DE.** 1993.  
801 A yeast mitogen-activated protein kinase homolog (Mpk1p) mediates signalling by protein kinase  
802 C. *Mol Cell Biol* **13**:3067–3075.
- 803
- 804 65. **Cooney NM, Klein BS.** 2008. Fungal adaptation to the mammalian host: it is a new world, after  
805 all. *Curr Opin Microbiol* **11**:511–516.
- 806
- 807 66. **Malavazi I, Goldman GH, Brown NA.** 2014. The importance of connections between the cell  
808 wall integrity pathway and the unfolded protein response in filamentous fungi. *Brief Funct*  
809 *Genomics* **13**:456–470.
- 810
- 811 67. **Teparić R, Mrsa V.** 2013. Proteins involved in building, maintaining and remodeling of yeast  
812 cell walls. *Curr Genet* **59**:171–185.
- 813
- 814 68. **Reinoso-Martín C, Schüller C, Schuetzer-Muehlbauer M, Kuchler K.** 2003. The yeast  
815 protein kinase C cell integrity pathway mediates tolerance to the antifungal drug caspofungin  
816 through activation of Slt2p mitogen-activated protein kinase signaling. *Eukaryotic Cell* **2**:1200–  
817 1210.
- 818
- 819 69. **Kapteyn JC, Ram AF, Groos EM, Kollar R, Montijn RC, Van Den Ende H, Llobell A,**  
820 **Cabib E, Klis FM.** 1997. Altered extent of cross-linking of beta1,6-glucosylated mannoproteins

- 821 to chitin in *Saccharomyces cerevisiae* mutants with reduced cell wall beta1,3-glucan content. *J*  
822 *Bacteriol* **179**:6279–6284.
- 823
- 824 70. **Mazur P, Morin N, Baginsky W, el-Sherbeini M, Clemas JA, Nielsen JB, Foor F.** 1995.  
825 Differential expression and function of two homologous subunits of yeast 1,3-beta-D-glucan  
826 synthase. *Mol Cell Biol* **15**:5671–5681.
- 827
- 828 71. **Popolo L, Gilardelli D, Bonfante P, Vai M.** 1997. Increase in chitin as an essential response to  
829 defects in assembly of cell wall polymers in the *gpg1* delta mutant of *Saccharomyces cerevisiae*. *J*  
830 *Bacteriol* **179**:463–469.
- 831
- 832 72. **Zhao C, Jung US, Garrett-Engele P, Roe T, Cyert MS, Levin DE.** 1998. Temperature-induced  
833 expression of yeast FKS2 is under the dual control of protein kinase C and calcineurin. *Mol Cell*  
834 *Biol* **18**:1013–1022.
- 835
- 836 73. **Georgopapadakou NH, Tkacz JS.** 1995. The fungal cell wall as a drug target. *Trends Microbiol*  
837 **3**:98–104.
- 838
- 839 74. **Debono M, Gordee RS.** 1994. Antibiotics that inhibit fungal cell wall development. *Annu Rev*  
840 *Microbiol* **48**:471–497.
- 841
- 842 75. **Denning DW.** 2003. Echinocandin antifungal drugs. *The Lancet* **362**:1142–1151.
- 843
- 844 76. **Sucher AJ, Chahine EB, Balcer HE.** 2009. Echinocandins: the newest class of antifungals. *Ann*  
845 *Pharmacother* **43**:1647–1657.
- 846
- 847 77. **Feng X, Krishnan K, Richie DL, Amanianda V, Hartl L, Grahl N, Powers-Fletcher MV,**  
848 **Zhang M, Fuller KK, Nierman WC, Lu LJ, Latgé J-P, Woollett L, Newman SL, Cramer**  
849 **RA, Rhodes JC, Askew DS.** 2011. HacA-independent functions of the ER stress sensor IreA  
850 synergize with the canonical UPR to influence virulence traits in *Aspergillus fumigatus*. *PLoS*  
851 *Pathog* **7**:e1002330.
- 852
- 853 78. **Richie DL, Feng X, Hartl L, Amanianda V, Krishnan K, Powers-Fletcher MV, Watson DS,**  
854 **Galande AK, White SM, Willett T, Latgé J-P, Rhodes JC, Askew DS.** 2011. The virulence of  
855 the opportunistic fungal pathogen *Aspergillus fumigatus* requires cooperation between the  
856 endoplasmic reticulum-associated degradation pathway (ERAD) and the unfolded protein  
857 response (UPR). *Virulence* **2**:12–21.
- 858
- 859 79. **Richie DL, Hartl L, Amanianda V, Winters MS, Fuller KK, Miley MD, White S,**  
860 **McCarthy JW, Latgé J-P, Feldmesser M, Rhodes JC, Askew DS.** 2009. A role for the  
861 unfolded protein response (UPR) in virulence and antifungal susceptibility in *Aspergillus*  
862 *fumigatus*. *PLoS Pathog* **5**:e1000258.
- 863
- 864 80. **Cheon SA, Jung K-W, Chen Y-L, Heitman J, Bahn Y-S, Kang HA.** 2011. Unique evolution  
865 of the UPR pathway with a novel bZIP transcription factor, Hx11, for controlling pathogenicity of  
866 *Cryptococcus neoformans*. *PLoS Pathog* **7**:e1002177.
- 867
- 868 81. **Zacchi LF, Gomez-Raja J, Davis DA.** 2010. Mds3 regulates morphogenesis in *Candida*  
869 *albicans* through the TOR pathway. *Mol Cell Biol* **30**:3695–3710.

870

- 871 82. **Bohovych I, Kastora S, Christianson S, Topil D, Kim H, Fangman T, Zhou YJ, Barrientos**  
872 **A, Lee J, Brown AJP, Khalimonchuk O.** 2016. Omal links mitochondrial protein quality  
873 control and TOR signaling to modulate physiological plasticity and cellular stress responses. *Mol*  
874 *Cell Biol* **36**:2300–2312.
- 875
- 876 83. **Liu N-N, Uppuluri P, Broggi A, Besold A, Ryman K, Kambara H, Solis N, Lorenz V, Qi W,**  
877 **Acosta-Zaldívar M, Emami SN, Bao B, An D, Bonilla FA, Sola-Visner M, Filler SG, Luo**  
878 **HR, Engström Y, Ljungdahl PO, Culotta VC, Zanoni I, Lopez-Ribot JL, Köhler JR.** 2018.  
879 Intersection of phosphate transport, oxidative stress and TOR signalling in *Candida albicans*  
880 virulence. *PLoS Pathog* **14**:e1007076.
- 881
- 882 84. **Brown GD, Denning DW, Gow NAR, Levitz SM, Netea MG, White TC.** 2012. Hidden  
883 killers: human fungal infections. *Sci Transl Med* **4**:165rv13.
- 884
- 885 85. **Havlickova B, Czaika VA, Friedrich M.** 2008. Epidemiological trends in skin mycoses  
886 worldwide. *Mycoses* **51 Suppl 4**:2–15.
- 887
- 888 86. **Enoch DA, Ludlam HA, Brown NM.** 2006. Invasive fungal infections: a review of  
889 epidemiology and management options. *J Med Microbiol* **55**:809–818.
- 890
- 891 87. **Shao P-L, Huang L-M, Hsueh P-R.** 2007. Recent advances and challenges in the treatment of  
892 invasive fungal infections. *Int J Antimicrob Agents* **30**:487–495.
- 893
- 894 88. **Barns SM, Lane DJ, Sogin ML, Bibeau C, Weisburg WG.** 1991. Evolutionary relationships  
895 among pathogenic *Candida* species and relatives. *J Bacteriol* **173**:2250–2255.
- 896
- 897 89. **Goldstein AL, McCusker JH.** 2001. Development of *Saccharomyces cerevisiae* as a model  
898 pathogen. A system for the genetic identification of gene products required for survival in the  
899 mammalian host environment. *Genetics* **159**:499–513.
- 900
- 901 90. **García R, Botet J, Rodríguez-Peña JM, Bermejo C, Ribas JC, Revuelta JL, Nombela C,**  
902 **Arroyo J.** 2015. Genomic profiling of fungal cell wall-interfering compounds: identification of a  
903 common gene signature. *BMC Genomics* **16**:683.
- 904
- 905 91. **Navarro-García F, Eisman B, Román E, Nombela C, Pla J.** 2001. Signal transduction  
906 pathways and cell-wall construction in *Candida albicans*. *Med Mycol* **39 Suppl 1**:87–100.
- 907
- 908 92. **Miyazaki T, Kohno S.** 2014. ER stress response mechanisms in the pathogenic yeast *Candida*  
909 *glabrata* and their roles in virulence. *Virulence* **5**:365–370.
- 910
- 911 93. **Brachmann CB, Davies A, Cost GJ, Caputo E, Li J, Hieter P, Boeke JD.** 1998. Designer  
912 deletion strains derived from *Saccharomyces cerevisiae* S288C: a useful set of strains and  
913 plasmids for PCR-mediated gene disruption and other applications. *Yeast* **14**:115–132.
- 914
- 915 94. **Winston F, Dollard C, Ricupero-Hovasse SL.** 1995. Construction of a set of convenient  
916 *Saccharomyces cerevisiae* strains that are isogenic to S288C. *Yeast* **11**:53–55.
- 917
- 918 95. **Stathopoulos AM, Cyert MS.** 1997. Calcineurin acts through the CRZ1/TCN1-encoded

- 919 transcription factor to regulate gene expression in yeast. *Genes Dev* **11**:3432–3444.  
920
- 921 96. **Martín H, Rodríguez-Pachón JM, Ruiz C, Nombela C, Molina M.** 2000. Regulatory  
922 mechanisms for modulation of signaling through the cell integrity Slr2-mediated pathway in  
923 *Saccharomyces cerevisiae*. *J Biol Chem* **275**:1511–1519.  
924
- 925 97. **Mumberg D, Müller R, Funk M.** 1995. Yeast vectors for the controlled expression of  
926 heterologous proteins in different genetic backgrounds. *Gene* **156**:119–122.  
927
- 928 98. **Gietz RD, Schiestl RH.** 2007. High-efficiency yeast transformation using the LiAc/SS carrier  
929 DNA/PEG method. *Nat Protoc* **2**:31–34.  
930
- 931 99. **Postma M, Goedhart J.** 2019. PlotsOfData-A web app for visualizing data together with their  
932 summaries. *PLoS Biol* **17**:e3000202.  
933
- 934 100. **Bonilla M, Nastase KK, Cunningham KW.** 2002. Essential role of calcineurin in response to  
935 endoplasmic reticulum stress. *EMBO J* **21**:2343–2353.  
936
- 937 101. **Kushnirov VV.** 2000. Rapid and reliable protein extraction from yeast. *Yeast* **16**:857–860.  
938
- 939 102. **Masotti A, Preckel T.** 2006. Analysis of small RNAs with the Agilent 2100 Bioanalyzer. *Nat*  
940 *Methods* **3**.  
941  
942

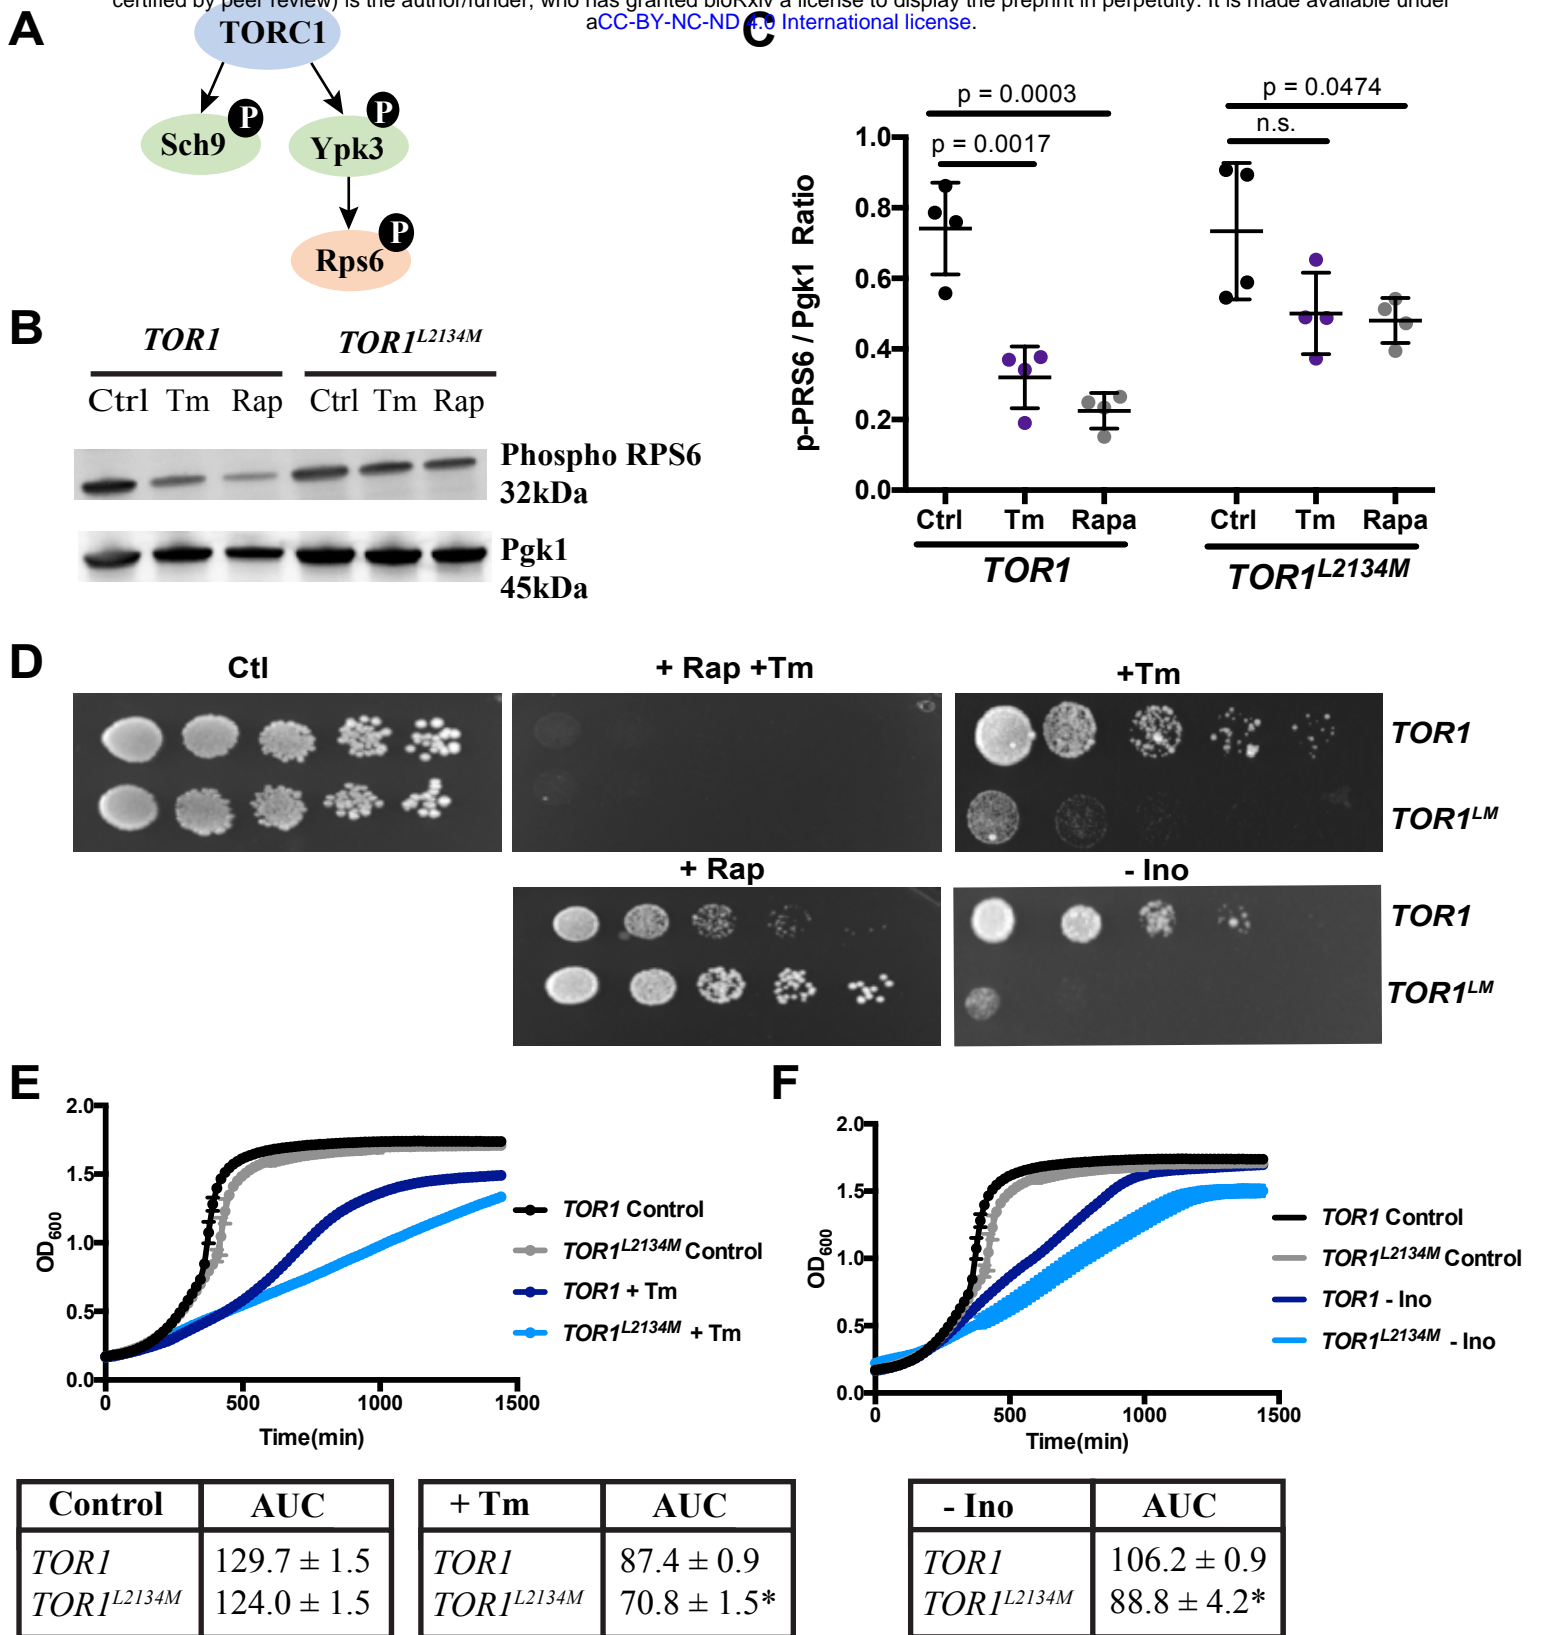

Fig. 1

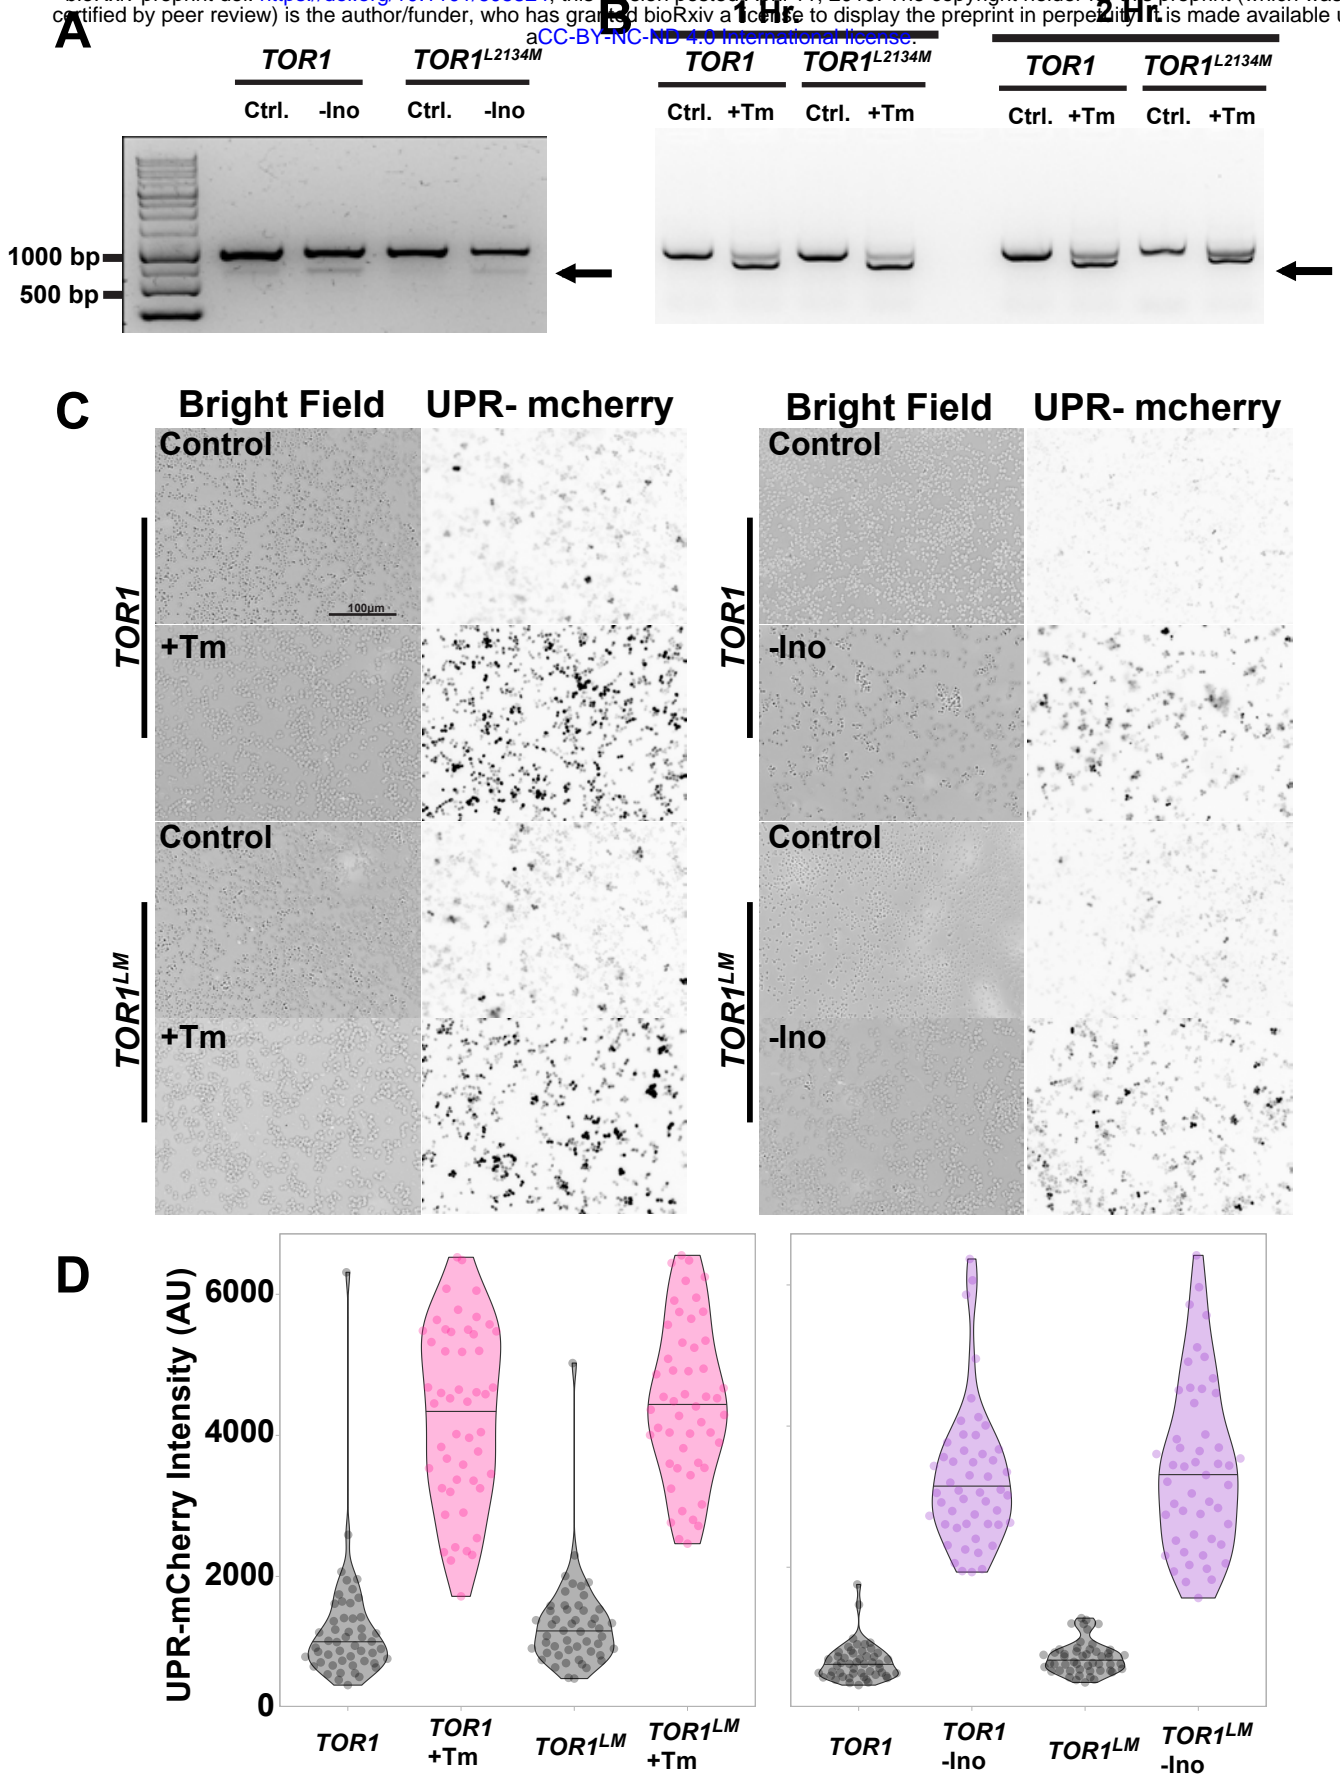

**Fig. 2**

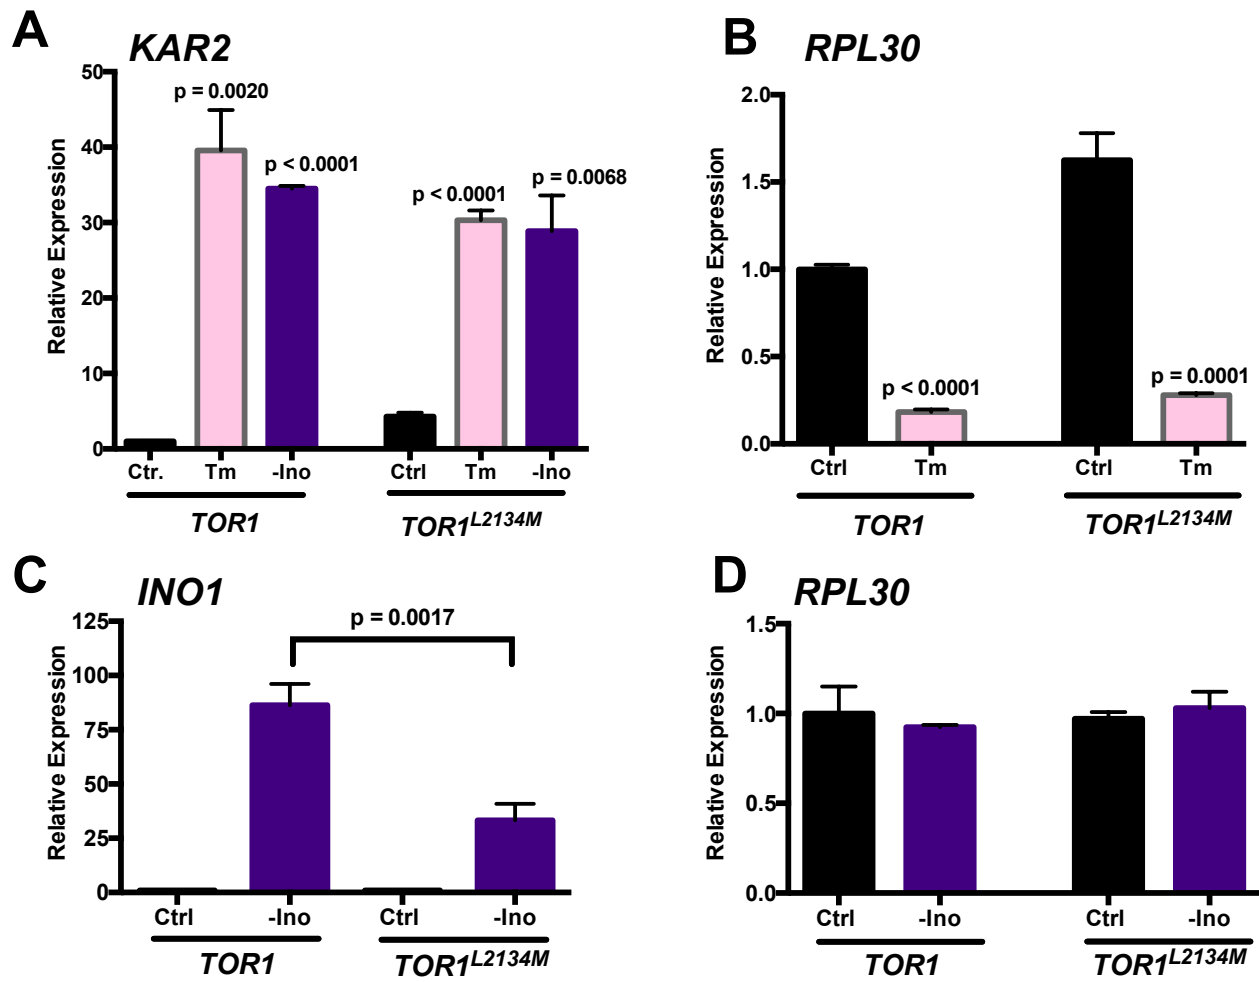

Fig. 3



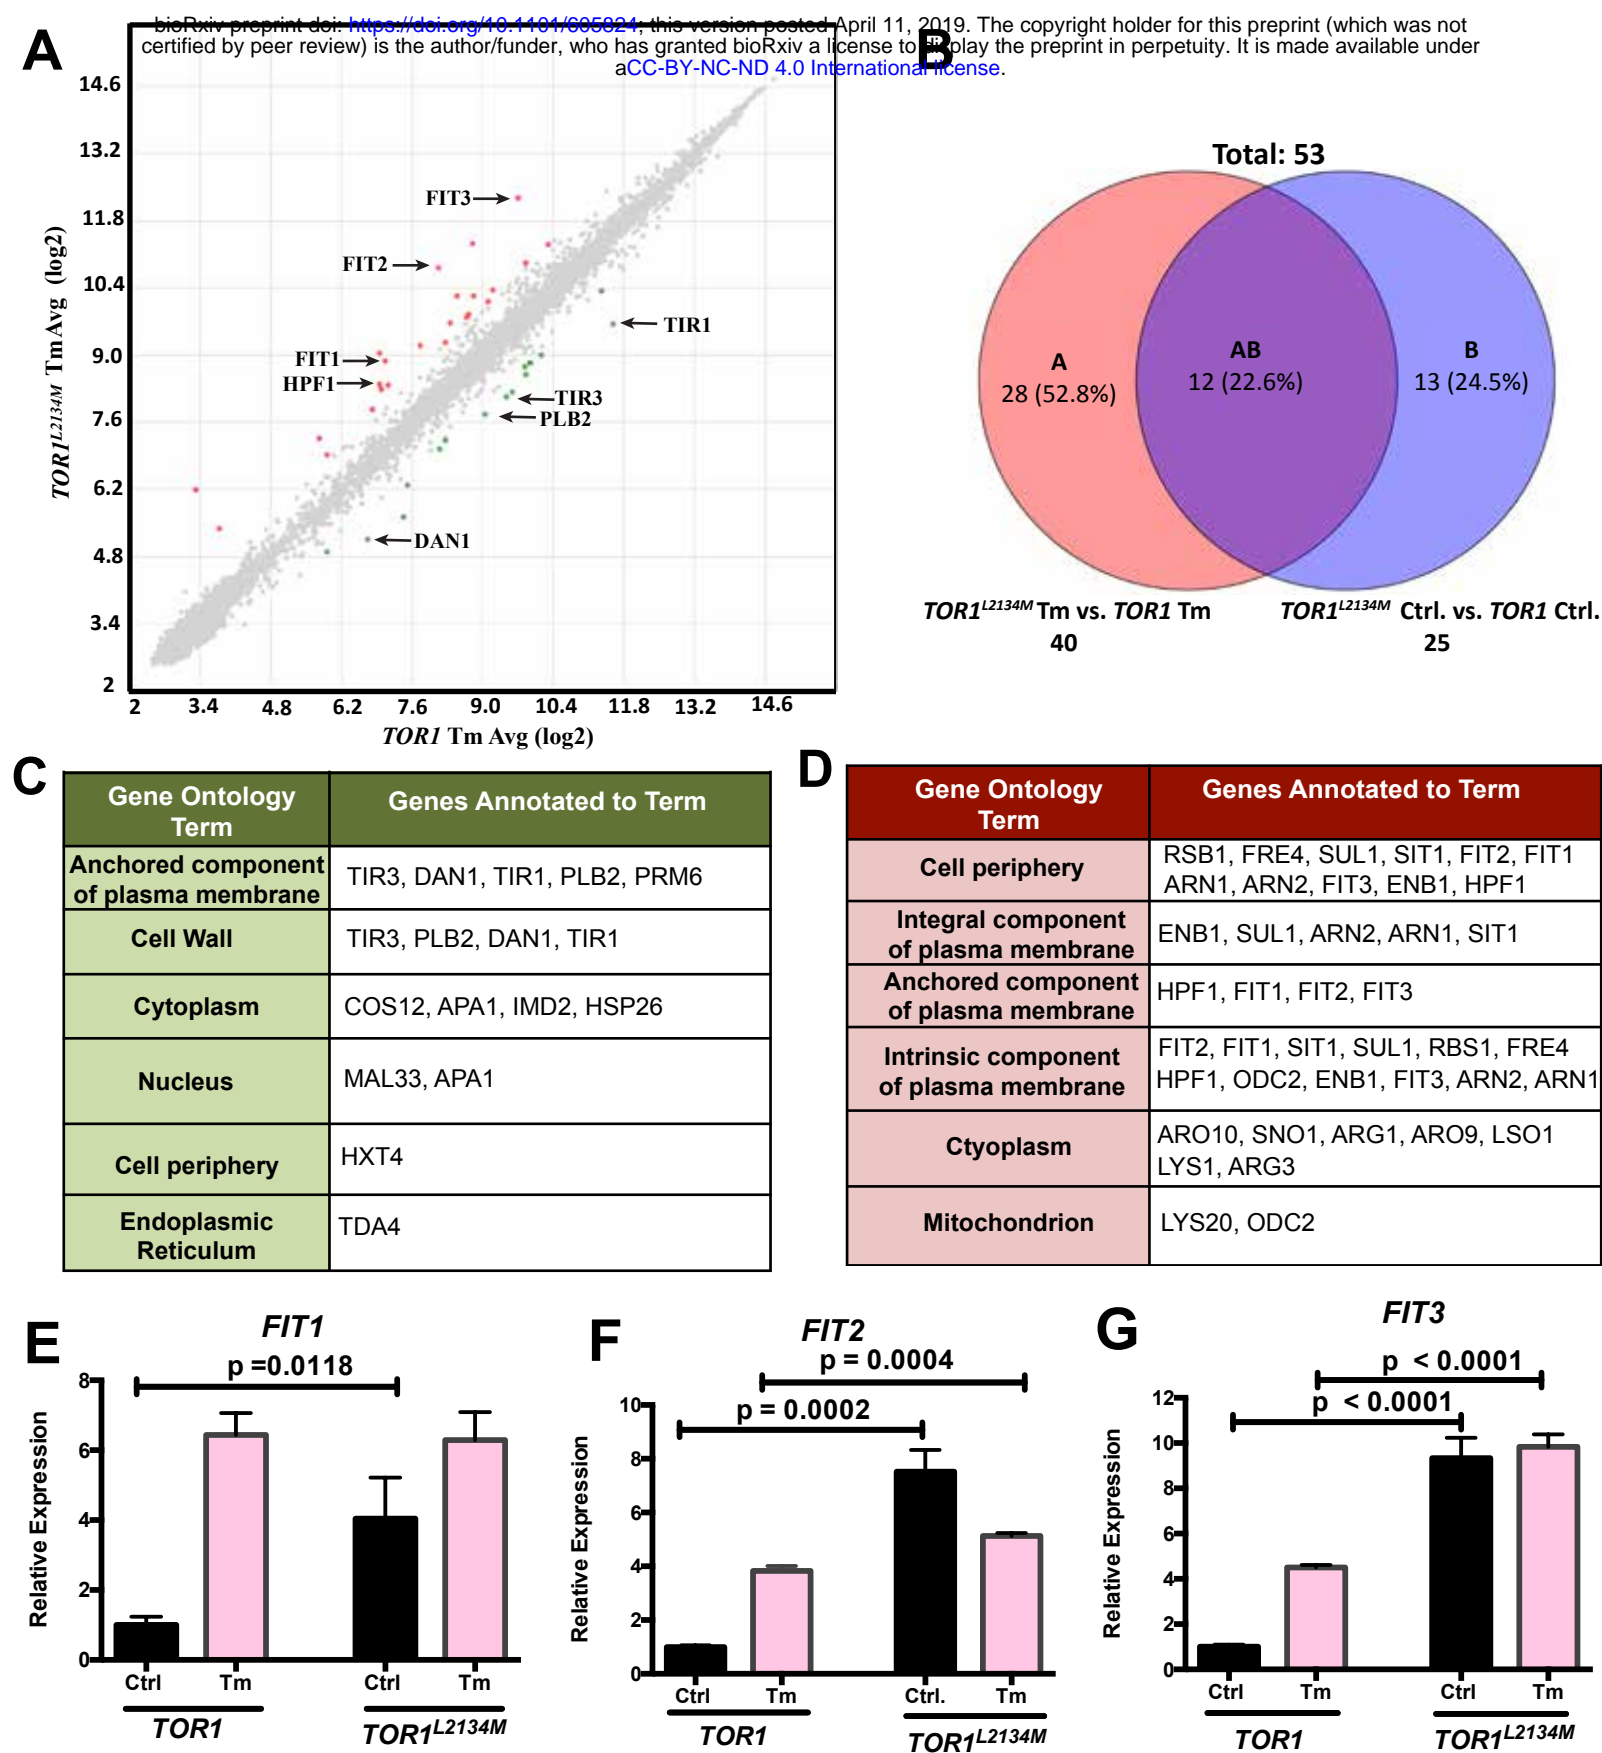

**Fig. 4**

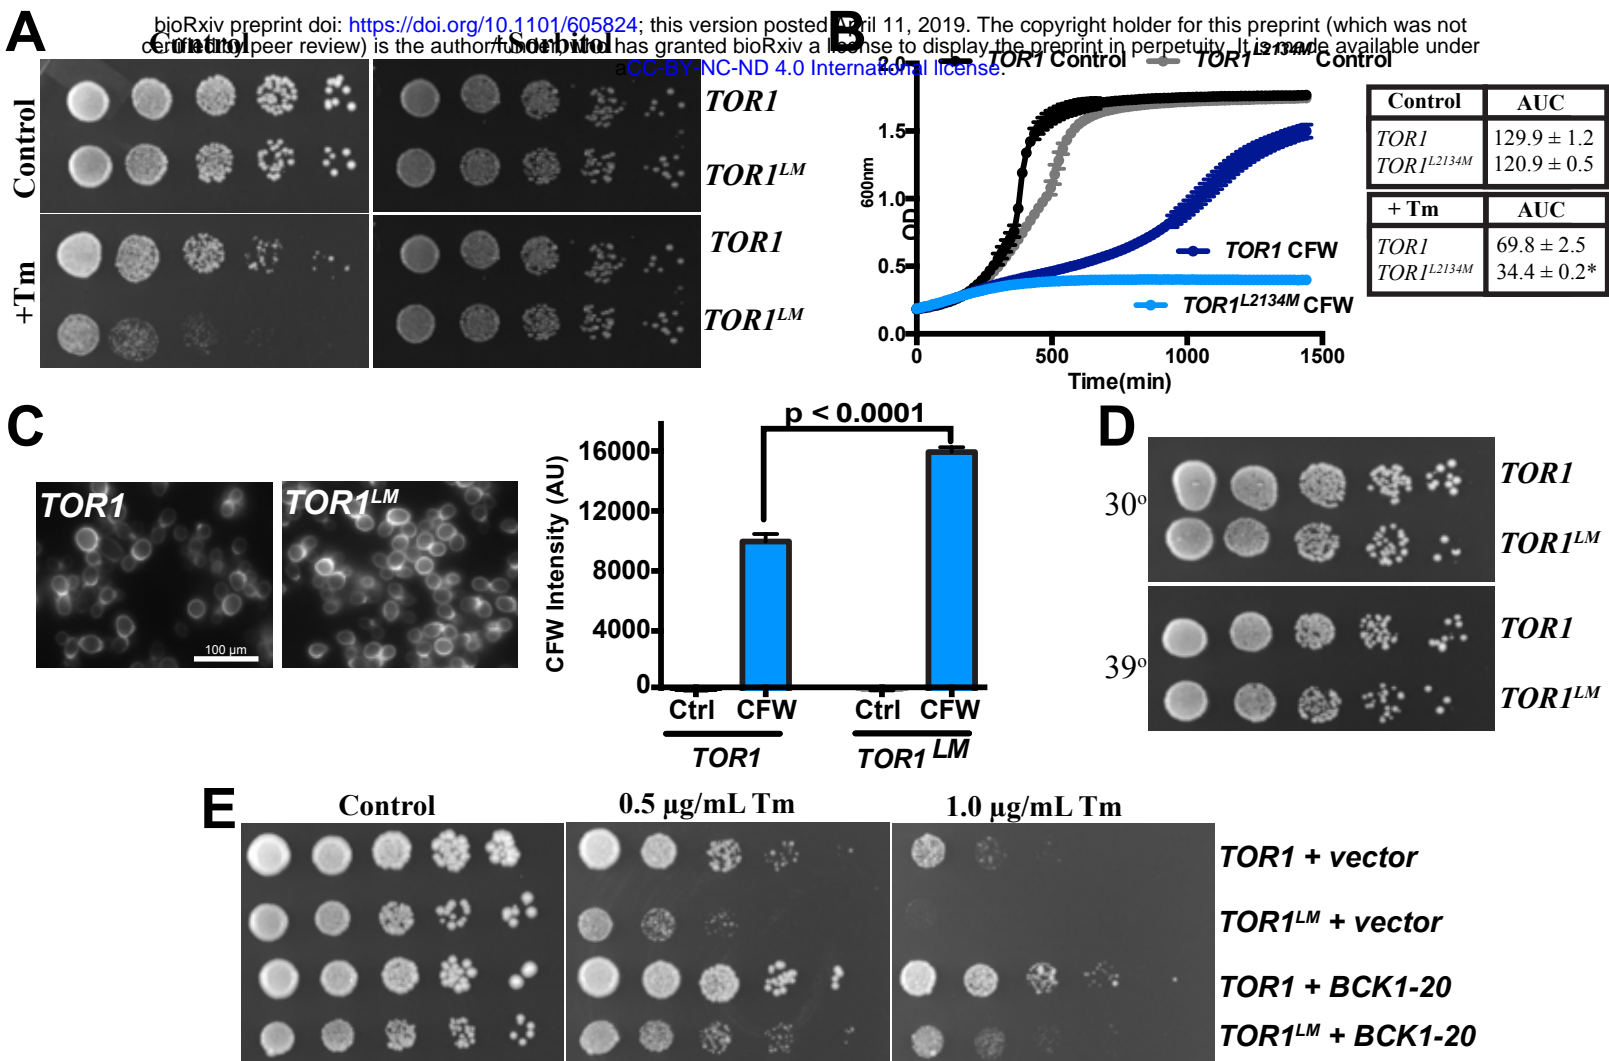

Fig. 5

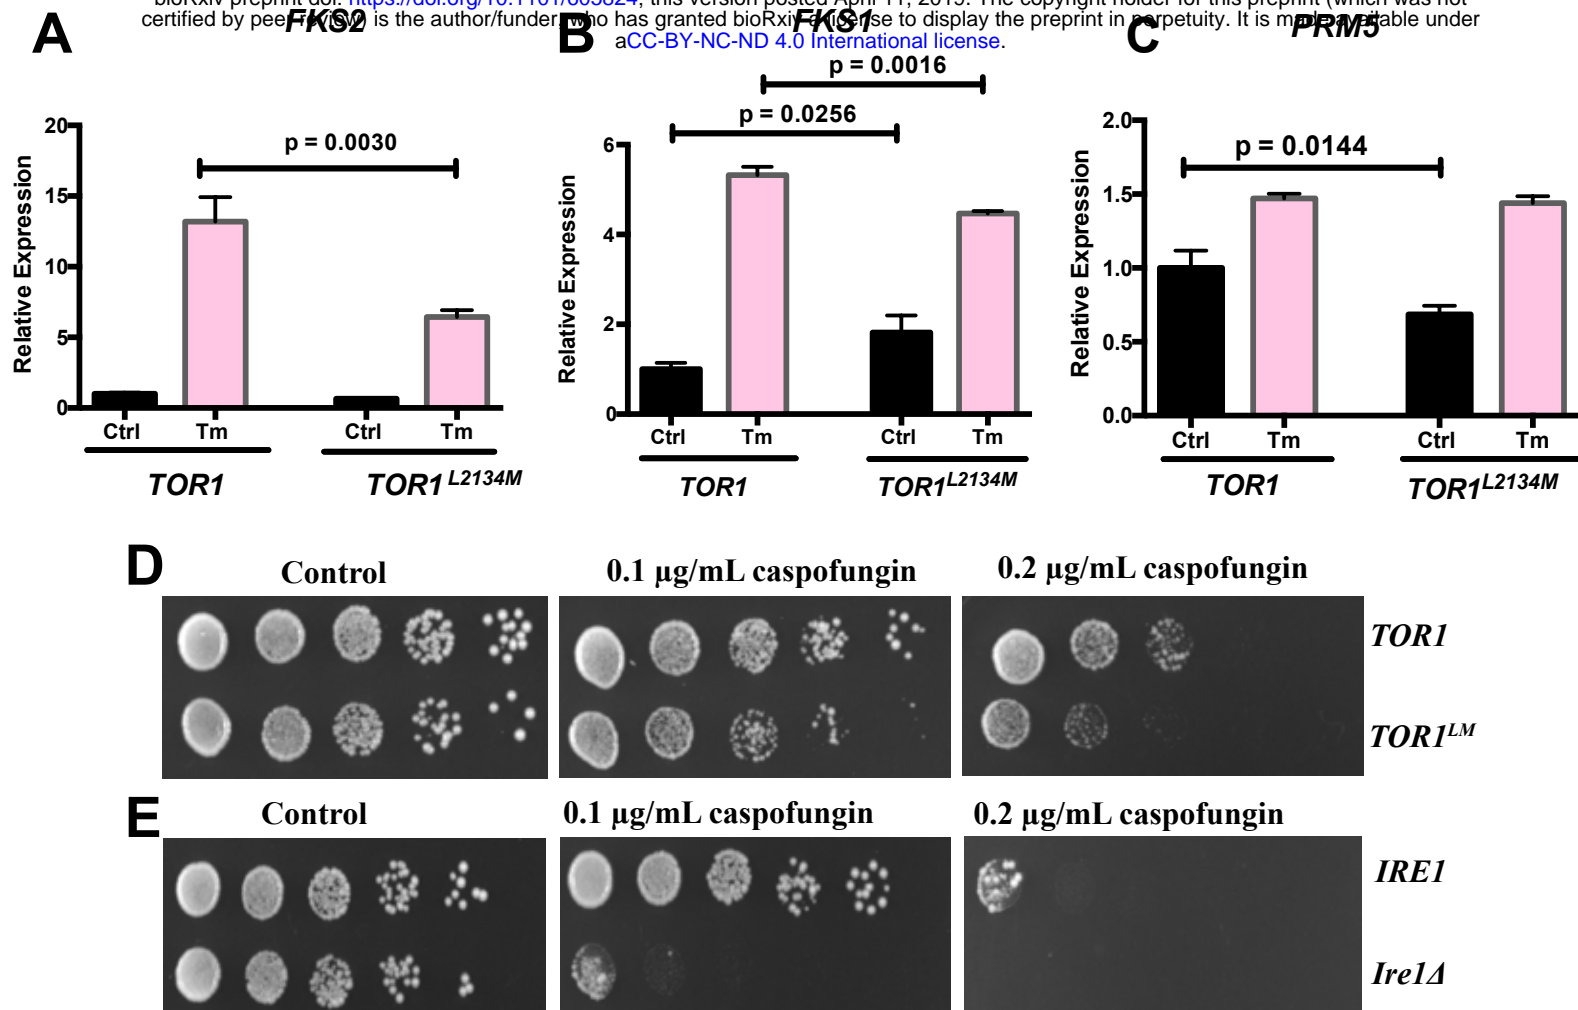

**Fig. 6**

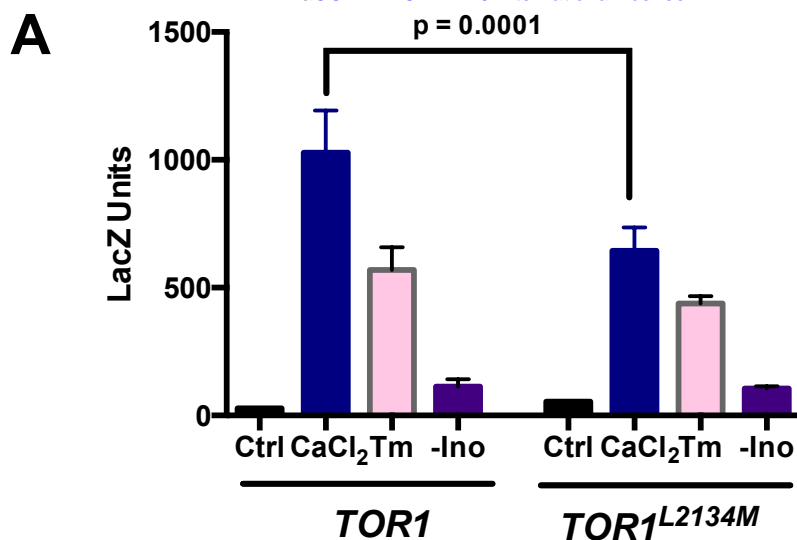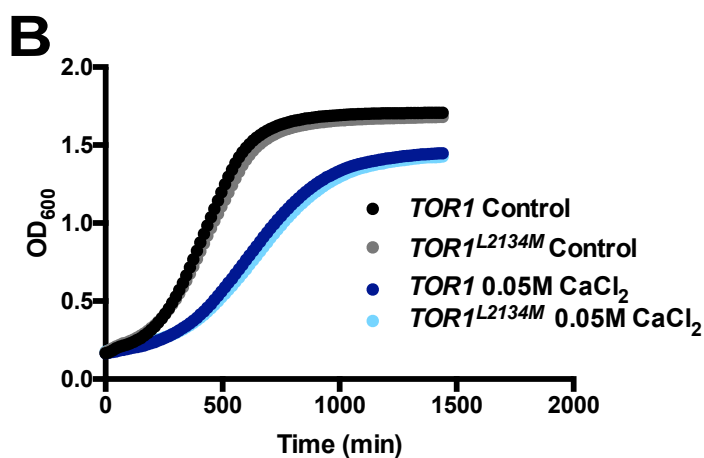

| Control                      | AUC         | CaCl <sub>2</sub>            | AUC        |
|------------------------------|-------------|------------------------------|------------|
| <i>TOR1</i>                  | 120.0 ± 0.5 | <i>TOR1</i>                  | 85.0 ± 0.5 |
| <i>TOR1<sup>L2134M</sup></i> | 116.7 ± 1.1 | <i>TOR1<sup>L2134M</sup></i> | 82.5 ± 1.4 |

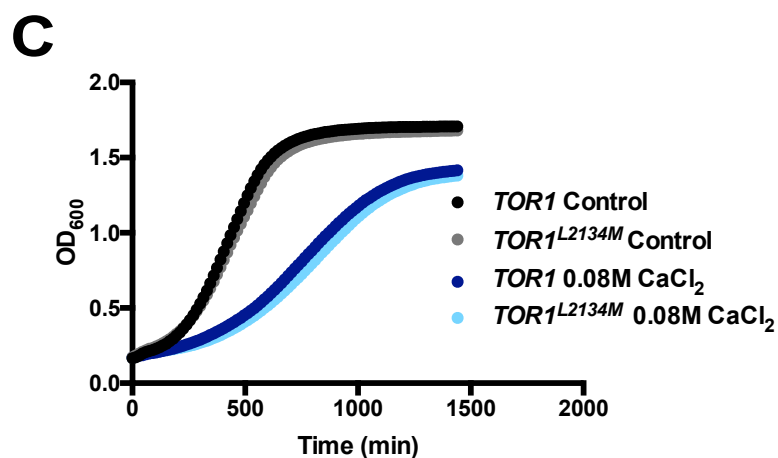

| CaCl <sub>2</sub>            | AUC        |
|------------------------------|------------|
| <i>TOR1</i>                  | 75.6 ± 0.5 |
| <i>TOR1<sup>L2134M</sup></i> | 71.2 ± 0.1 |

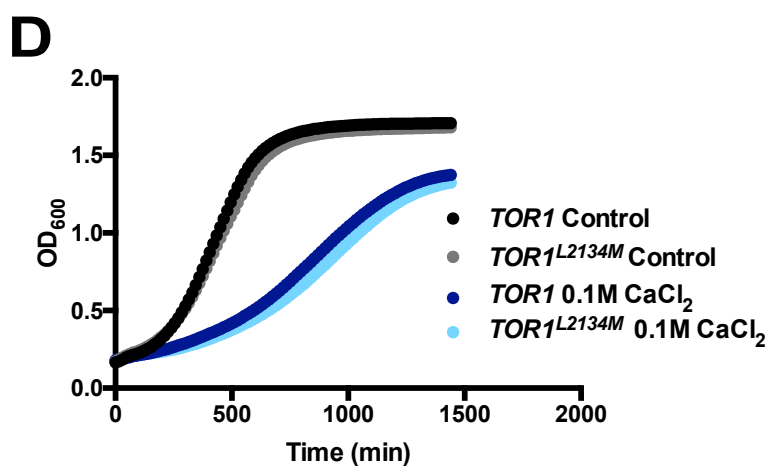

| CaCl <sub>2</sub>            | AUC        |
|------------------------------|------------|
| <i>TOR1</i>                  | 69.4 ± 0.4 |
| <i>TOR1<sup>L2134M</sup></i> | 69.4 ± 1.2 |

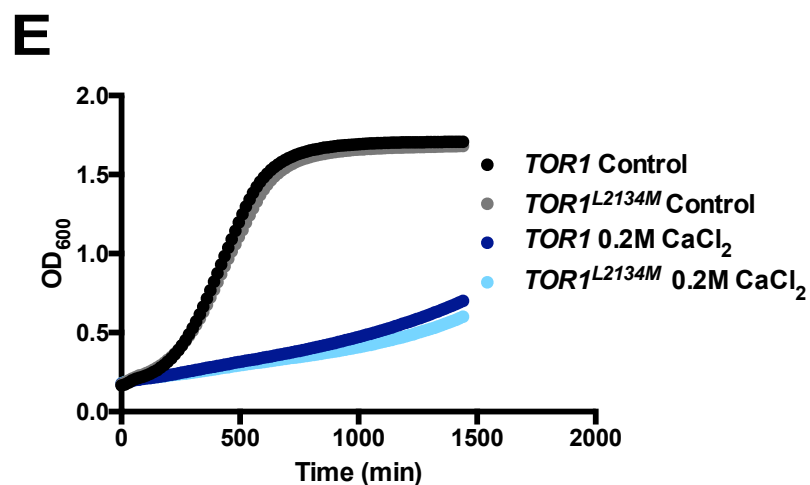

| CaCl <sub>2</sub>            | AUC        |
|------------------------------|------------|
| <i>TOR1</i>                  | 38.1 ± 0.5 |
| <i>TOR1<sup>L2134M</sup></i> | 34.0 ± 0.5 |
